# Supplementary material
Source: PubMed Central journal article supplement (PMC5777231)
Supplement: NIHMS897196-supplement-1.pdf [file NIHMS897196-supplement-1.pdf]

1 **Commensal bacteria produce GPCR ligands that mimic human signaling molecules**

2

3 **Authors:** Louis J. Cohen<sup>1,2</sup>, Daria Esterhazy<sup>3</sup>, Seong-Hwan Kim<sup>1</sup>, Christophe Lemetre<sup>1</sup>, Rhiannon R. Aguilar<sup>1</sup>,  
4 Emma A. Gordon<sup>1</sup>, Amanda J. Pickard<sup>6</sup>, Justin R. Cross<sup>6</sup>, Ana B. Emiliano<sup>4</sup>, Sun M. Han<sup>1</sup>, John Chu<sup>1</sup>, Xavier  
5 Vila-Farres<sup>1</sup>, Jeremy Kaplitt<sup>1</sup>, Aneta Rogoz<sup>3</sup>, Paula Y. Calle<sup>1</sup>, Craig Hunter<sup>5</sup>, J. Kipchirchir Bitok<sup>1</sup>, Sean F.  
6 Brady<sup>1</sup>

7

8 **Author Affiliation:**

9 <sup>1</sup> Laboratory of Genetically Encoded Small Molecules, The Rockefeller University

10 <sup>2</sup> Division of Gastroenterology, Department of Medicine, Icahn School of Medicine at Mount Sinai

11 <sup>3</sup> Laboratory of Mucosal Immunology, The Rockefeller University

12 <sup>4</sup> Laboratory of Molecular Genetics, The Rockefeller University

13 <sup>5</sup> Comparative Biosciences Center, The Rockefeller University

14 <sup>6</sup> Donald B. and Catherine C. Marron Cancer Metabolism Center, Memorial Sloan Kettering Cancer Center

15

16 **Author Contributions:**

17 L.J.C. and S.F.B. designed research; L.J.C. assisted with all experiments; S-H.K. assisted with molecule  
18 characterization; E.A.G., P.Y.C., J.K.B., and R.R.A. assisted with gene cloning; D.E., A.B.E., S.M.H., C.H. and  
19 A.R. assisted with mouse experiments; J.C., X.V-F., J.K. assisted with molecule synthesis; A.J.P. and J.R.C.  
20 assisted with metabolite analysis in human/mouse samples; L.J.C. and C.L. analyzed data; L.J.C. and S.F.B.  
21 wrote the paper

22

23 **Author Information:**

24 Authors declare no financial competing interests. Correspondence and requests for materials should be  
25 addressed to S.F.B. ([sbrady@rockefeller.edu](mailto:sbrady@rockefeller.edu)).

26

27 **Contact:** Laboratory of Genetically Encoded Small Molecules, The Rockefeller University, 1230 York Avenue,  
28 New York, New York, 10065

29

30 **Keywords:** GPCR, microbiome, metagenome, signaling, *N*-acyl amide

31

32

33

## 1 Supplementary NMR Discussion, Figures and Tables

2

### 3 Compound isolation and NMR structure determination overview

4 For each compound family, dried ethyl acetate extracts were partitioned by reversed phase flash  
5 column chromatography (Teledyne Isco, C<sub>18</sub> RediSep RF Gold<sup>™</sup> 15 g) using the following mobile phase  
6 conditions: solvent A:B (water:acetonitrile with 0.1% formic acid) 10% B isocratic for 5 min, gradient to 100% B  
7 over 20 minutes (30 ml/min). Fractions containing clone specific metabolites as identified by LCMS were  
8 pooled and semi-preparative reversed phase HPLC was used to separate individual *N*-acyl amide molecules  
9 (Waters XBridge<sup>™</sup> C<sub>18</sub>, 10 mm x 250 mm: 4.8 ml/min: solvent A:B, water:acetonitrile with 0.1% TFA).  
10 Chromatographic details for each metabolite analyzed by NMR.

11

12 Molecule **2**: retention time 8.5 min, gradient 85% B to 100% B over 20 min

13 Molecule **3**: retention time 13 min, isocratic 70% B

14 Molecule **4a**: retention time 17 min, isocratic 40% B for 5 min, gradient from 40% to 72% B over 15 min

15 Molecule **4b**: retention time 16 min, isocratic 40% B for 5 min, gradient from 40% to 72% B over 15 min

16 Molecule **5**: retention time 9.5 min, isocratic 60% B for 5 min, gradient from 60% to 100% B over 10 min

17 Molecule **6**: retention time 17 min, isocratic 50% B for 5 min, gradient from 50% to 100% B over 15 min

18

19 Each *E. coli* strain transformed with a single hm-NAS gene produced a family of related *N*-acyl amides.  
20 With the exception of compound family 4 (compounds **4a** and **4b**), <sup>1</sup>H NMR and MS analysis indicated that  
21 cultures produced metabolites with the same amine head group but different acyl substituents. Based on MS  
22 data acyl substituents were predicted to be fully saturated or mono-unsaturated and differ only slightly in  
23 length. The most common acyl chains incorporated by hm-NASs are from 14-18 carbons in length. These can  
24 be modified by β-hydroxylation or a single unsaturation. In the case of family 4 <sup>1</sup>H NMR data suggested two  
25 different amine head groups. The major *N*-acyl amide produced by weight for each family was selected for in  
26 depth structural analysis. In the case of family 4, the major *N*-acyl amide by weight for each head group was  
27 structurally characterized (compounds **4a** and **4b**). The following pages include in depth structure  
28 determination analyses for each purified compound.

29

30

## 1 Family 2 – compound 2

2 For family 2 we were not able to completely separate individual *N*-acyl amides from each other. The  
 3 material we structurally characterized contained a mixture of two *N*-acyl amides (one major and one minor  
 4 metabolite) that differed by 26 units ( $m/z$ :  $[M+H]^+$  611, 637). The HRMS predicted molecular formula of the  
 5 dominant compound in the mixture was  $C_{36}H_{70}N_2O_5$  ( $m/z$ :  $[M+H]^+$  Calcd  $C_{36}H_{71}N_2O_5$  611.5363; found 611.5385).  
 6 The COSY spectrum defined 5 spin systems. The 5-carbon-NH COSY spin system together with an HMBC  
 7 correlation between H-1' ( $\delta_H$  3.03) and C-2' ( $\delta_C$  176.8) supported the presence of an *N*-acylated lysine  
 8 substructure. The 4-carbon COSY spin system together with an HMBC correlation from H-2 to the C-1  
 9 carbonyl indicated the presence of a C-3 oxidized fatty acid. The presence of two separate acyl chains was  
 10 suggested by the presence of two terminal methyl triplets in the  $^1H$  NMR spectrum. The appearance of the  
 11 mass for *N*-hydroxypalmitoyl lysine in the HR MS/MS fragmentation analysis allowed us to define the structure  
 12 of one acyl substituent as [C16:3-OH]. The length of the second acyl group was predicted based on the  
 13 predicted molecular formula [C14]. Based on this analysis the final structure of compound 2 was determined to  
 14 be 3-(myristoyloxy)palmitoyl lysine. Based on the small olefinic proton signal ( $\delta_H$  5.32) in the  $^1H$  NMR spectrum  
 15 and MS/MS fragmentation analysis the minor compound in the mixture ( $m/z$ :  $[M+H]^+$  637) was predicted to  
 16 contain a double bond and longer acyl substituents.

17

## 18 NMR Table Compound 2

| Position           | Compound 2 <sup>a c</sup> |                                |
|--------------------|---------------------------|--------------------------------|
|                    | $\delta_C$ , type         | $\delta_H$ , mult ( $J$ in Hz) |
| 1                  | 172.8, C                  |                                |
| 2                  | 33.3, CH <sub>2</sub>     | 2.30, dd (6.5, 6.5)            |
| 3                  | 65.3, CH                  | 3.92, m                        |
| 4                  | 31.0, CH <sub>2</sub>     | 1.21, m <sup>b</sup>           |
| 5                  | 28.7, CH <sub>2</sub>     | 1.23, m <sup>b</sup>           |
| 6                  | 28.8, CH <sub>2</sub>     | 1.22, m <sup>b</sup>           |
| 7-13 <sup>b</sup>  | 28.8, CH <sub>2</sub>     | 1.22, m <sup>b</sup>           |
| 14                 | 31.0, CH <sub>2</sub>     | 1.23, m <sup>b</sup>           |
| 15                 | 22.8, CH <sub>2</sub>     | 1.29, m <sup>b</sup>           |
| 16                 | 13.6, CH <sub>3</sub>     | 0.86, t (7.0)                  |
| 17                 | 174.8, C                  |                                |
| 18                 | 33.3, CH <sub>2</sub>     | 2.18, t (7.5)                  |
| 19                 | 24.5, CH <sub>2</sub>     | 1.47, m                        |
| 20-27 <sup>b</sup> | 28.8, CH <sub>2</sub>     | 1.22, m <sup>b</sup>           |
| 28                 | 29.4, CH <sub>2</sub>     | 1.23, m <sup>b</sup>           |
| 29                 | 23.0, CH <sub>2</sub>     | 1.29, m <sup>b</sup>           |
| 30                 | 10.5, CH <sub>3</sub>     | 0.86, t (7.0)                  |
| NH                 |                           | 7.69, d (7.0)                  |
| 1'                 | 41.0, CH                  | 3.03, dd (6.0, 6.0)            |
| 2'                 | 176.8, C                  |                                |
| 3'                 | 24.1, CH <sub>2</sub>     | 1.47, m                        |
| 4'                 | 22.0, CH <sub>2</sub>     | 1.22, m                        |
| 5'                 | 23.8, CH <sub>2</sub>     | 1.50, m                        |
| 6'                 | 36.0, CH <sub>2</sub>     | 2.26, m                        |

— COSY  
 → HMBC

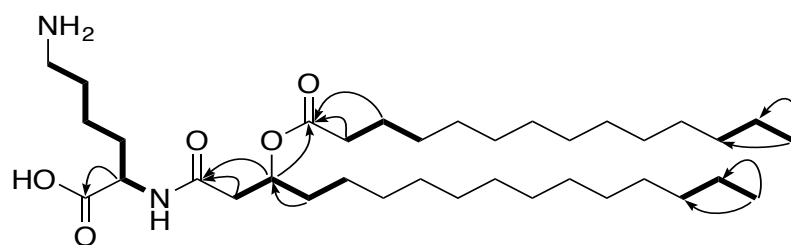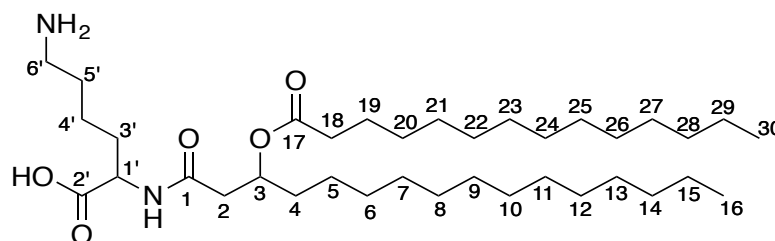

28 <sup>a</sup>600MHz for  $^1H$ , <sup>b</sup> overlapped signal, <sup>c</sup> Carbon chemical shift from HSQC and HMBC correlations

1  $^1\text{H}$  NMR spectrum of compound **2** in  $\text{DMSO-}d_6$

2

20160421\_52f66p4.1.fid  
1H 20160421\_52f66p4

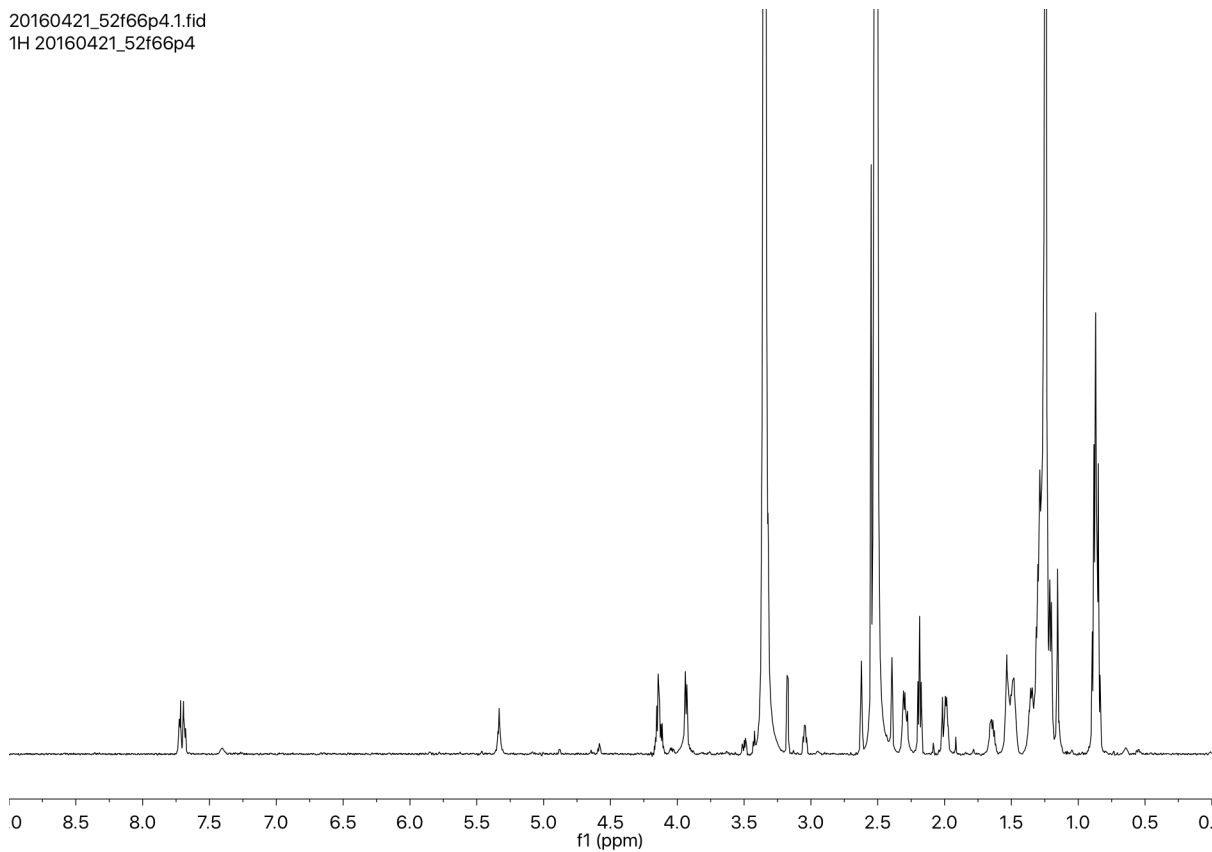

3  
4 COSY spectrum of compound **2** in  $\text{DMSO-}d_6$ .

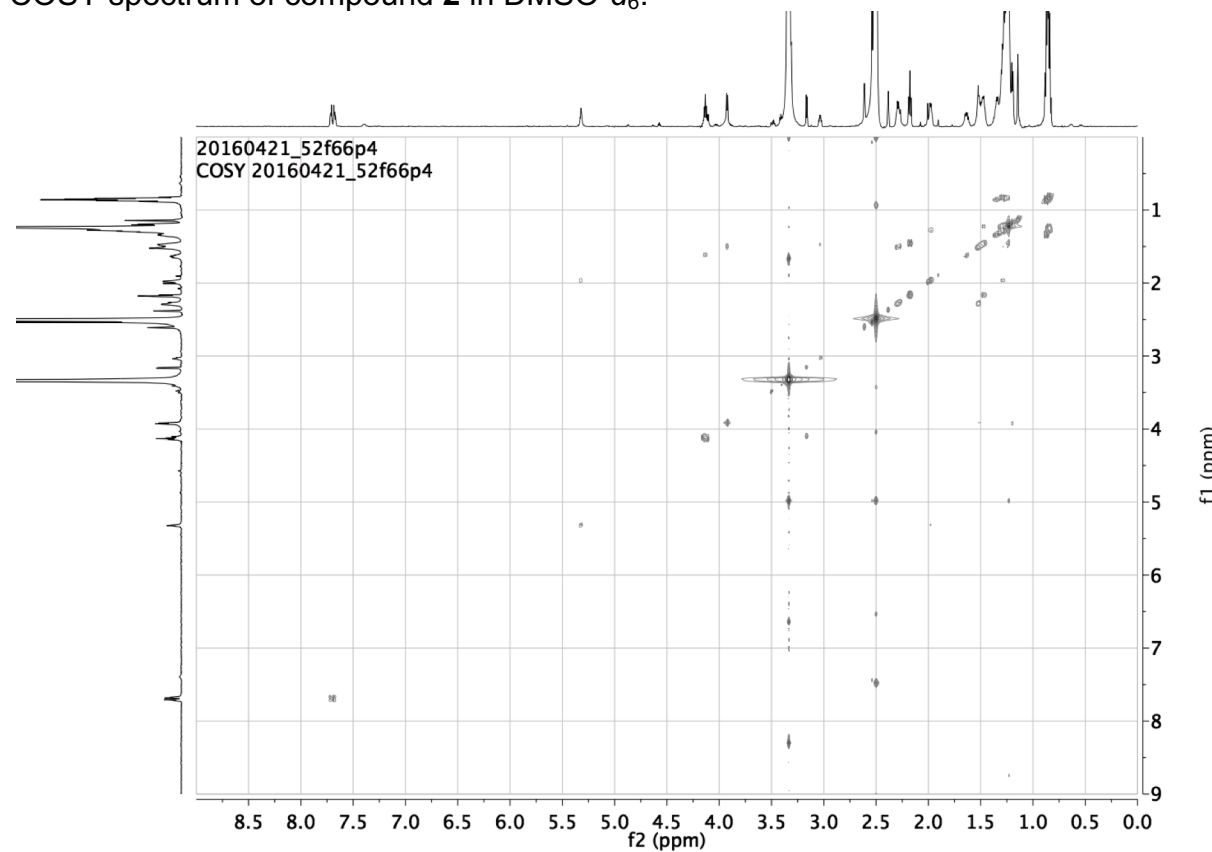

5  
6  
7  
8

1 HSQC spectrum of compound 2 in DMSO-d<sub>6</sub>.

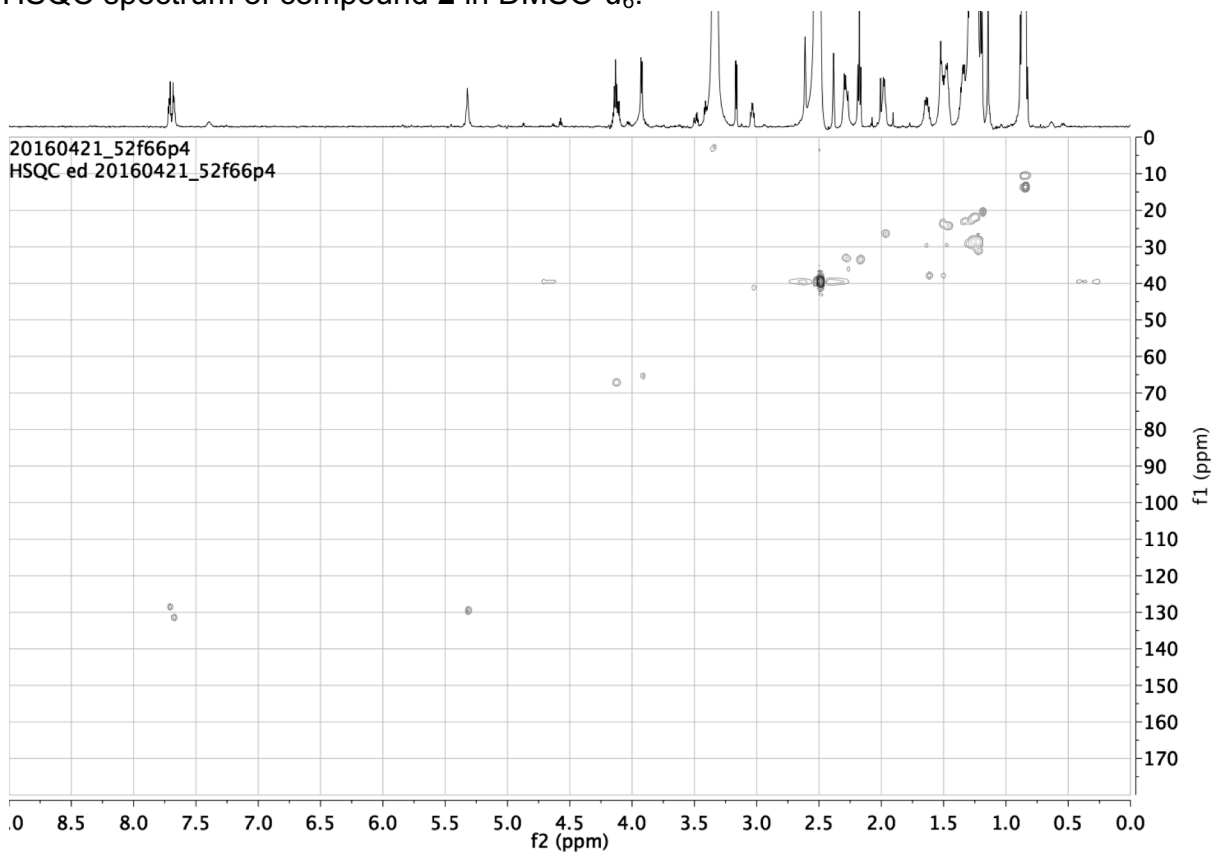

2  
3  
4  
5  
HMBC spectrum of compound 2 in DMSO-d<sub>6</sub>.

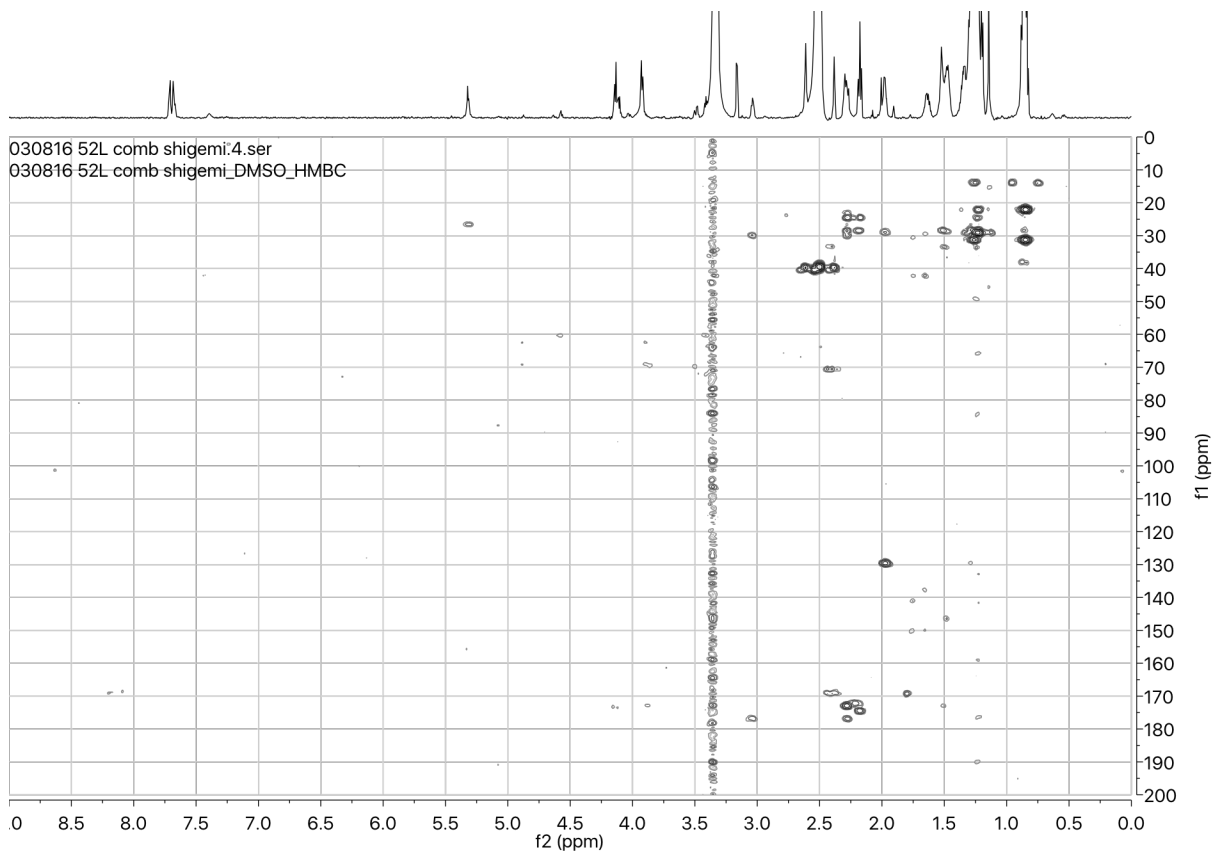

6  
7  
8

1  
2 HRESI-MS/MS fragmentation for compound 2

3

MS172892XL\_Seong-Hwan\_Brady\_52-611 #2516 RT: 30.98 AV: 1 NL  
T: FTMS + c ESI d Full ms2 611.53@cid35.00 [155.00-625.00]

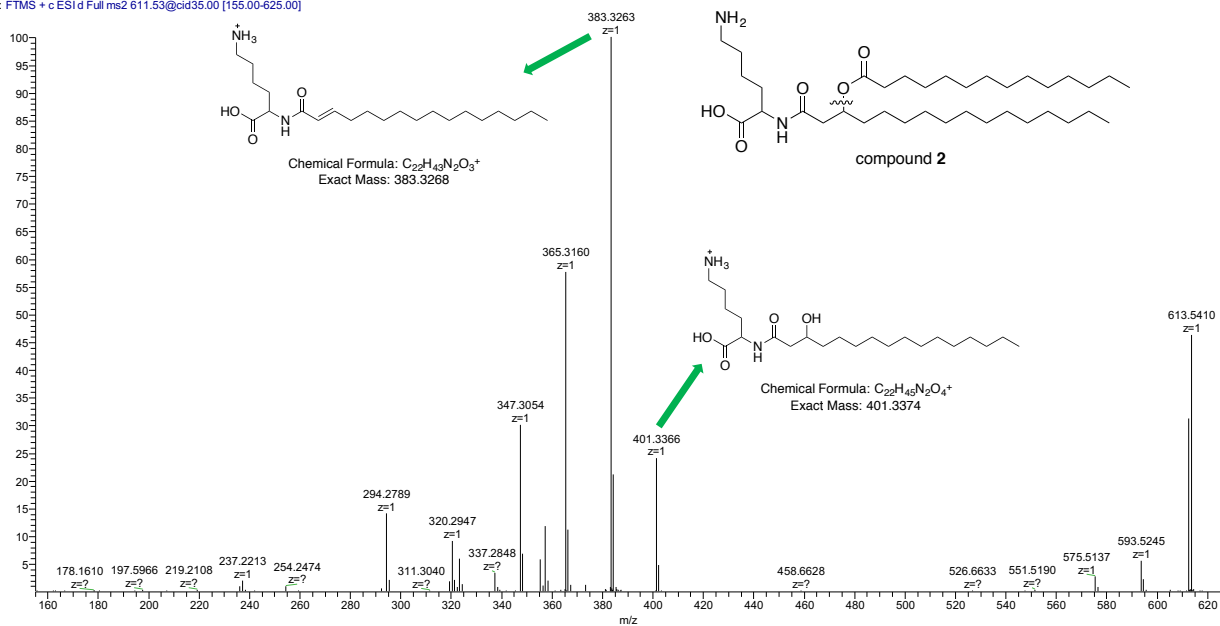

4

1 **Family 3 – compound 3**

2 The molecular formula predicted by HRMS for compound **3** was C<sub>29</sub>H<sub>54</sub>N<sub>2</sub>O<sub>7</sub> (*m/z*: [M+H]<sup>+</sup> Calcd  
 3 C<sub>29</sub>H<sub>55</sub>N<sub>2</sub>O<sub>7</sub> 543.4009, found 543.4009). The <sup>1</sup>H NMR of compound **3** exhibited two oxygenated methines, a  
 4 group of highly overlapped aliphatic methylene proton signals (δ<sub>H</sub> 1.24~1.21) and two terminal methyl triplets.  
 5 The <sup>13</sup>C NMR of compound **3** exhibited four carbonyl carbons, two oxygen bearing carbons, an aliphatic  
 6 methine carbon, two methyl carbons, ten distinguished aliphatic methylene carbons and additional overlapping  
 7 aliphatic methylene carbons (δ<sub>C</sub> 28.8-28.6). COSY correlations defined five spin systems. Starting from the 3-  
 8 carbon-NH COSY spin system, HMBC correlations from H-1' (δ<sub>H</sub> 4.12) and H<sub>2</sub>-3' (δ<sub>H</sub> 1.91 and 1.73) to C-2' (δ<sub>C</sub>  
 9 173.4) and H-4' (δ<sub>H</sub> 2.10) and H<sub>2</sub>-3' (δ<sub>H</sub> 1.91 and 1.73) to C-5' (δ<sub>C</sub> 173.4) defined the structure of glutamine. An  
 10 HMBC correlation from H-3 (δ<sub>H</sub> 5.07) to C-11 (δ<sub>C</sub> 170.7) was used to connect the glutamine through an amide  
 11 bond to a C-3 oxidized fatty acid. HMBC correlations from H-1' (δ<sub>H</sub> 4.12) and H<sub>2</sub>-12 to C-11 allowed us to  
 12 connect a second fatty acid to this substructure through an ester bond. The exact nature of each fatty acid  
 13 was defined by HRESI-MS/MS fragmentation analysis. Based on this analysis the *N*-acyl fatty acid chain was  
 14 predicted to contain 10 carbons and the acyl fatty chain was predicted to contain 14 carbons. Thus, the  
 15 structure of **3** was determined to be 3-[(3-OH-myristoyl)oxy]decanoyl glutamine.

16

17 **NMR Table Compound 3**

| Position | Compound 3 <sup>a</sup> |                                         |
|----------|-------------------------|-----------------------------------------|
|          | δ <sub>C</sub> , type   | δ <sub>H</sub> , mult ( <i>J</i> in Hz) |
| 1        | 169.1, C                |                                         |
| 2        | 39.8, CH <sub>2</sub>   | 2.41                                    |
| 3        | 70.7, CH                | 2.36, dd (7.5, 7.5)                     |
| 4        | 33.2, CH <sub>2</sub>   | 5.07, m                                 |
| 5        | 28.6, CH <sub>2</sub>   | 1.54, m <sup>b</sup>                    |
| 6        | 28.8, CH <sub>2</sub>   | 1.48, m <sup>b</sup>                    |
| 7        | 28.9, CH <sub>2</sub>   | 1.23, m <sup>b</sup>                    |
| 8        | 31.3, CH <sub>2</sub>   | 1.22, m <sup>b</sup>                    |
| 9        | 22.1, CH <sub>2</sub>   | 1.21, m <sup>b</sup>                    |
| 10       | 14.0, CH <sub>3</sub>   | 1.23, m <sup>b</sup>                    |
| 11       | 170.7, C                | 0.85, t (7.0)                           |
| 12       | 42.8, CH <sub>2</sub>   | 2.30                                    |
| 13       | 67.2, CH                |                                         |
| 14       | 36.7, CH <sub>2</sub>   | 3.78, m <sup>b</sup>                    |
| 15       | 28.6, CH <sub>2</sub>   | 1.34, t (7.0)                           |
| 16       | 28.6, CH <sub>2</sub>   | 1.30                                    |
| 17       | 28.6, CH <sub>2</sub>   | 1.24, m                                 |
| 18       | 28.6, CH <sub>2</sub>   | 1.24, m                                 |
| 19       | 28.6, CH <sub>2</sub>   | 1.24, m                                 |
| 20       | 28.6, CH <sub>2</sub>   | 1.24, m                                 |
| 21       | 28.6, CH <sub>2</sub>   | 1.24, m                                 |
| 22       | 31.3, CH <sub>2</sub>   | 1.24, m                                 |
| 23       | 22.1, CH <sub>2</sub>   | 1.21, m                                 |
| 24       | 14.0, CH <sub>3</sub>   | 1.23, m                                 |
| NH       |                         | 0.85, t (7.0)                           |
| 1'       | 51.6, CH                | 8.03, d (7.0)                           |
| 2'       | 173.4, C                | 4.12, dq (7.5, 7.0)                     |
| 3'       | 26.8, CH <sub>2</sub>   | 1.91, d (7.5)                           |
| 4'       | 31.3, CH <sub>2</sub>   | 1.73,                                   |
| 5'       | 173.4, C                | 2.10, m                                 |

— COSY

→ HMBC

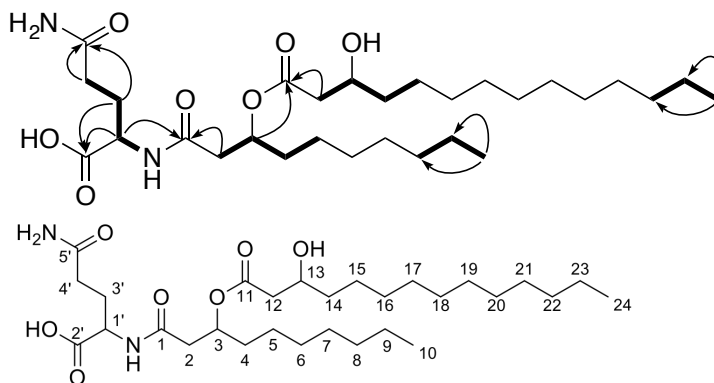

42 <sup>a</sup>600 MHz for <sup>1</sup>H and 150 MHz for <sup>13</sup>C, <sup>b</sup>overlapped signal

1  
2 <sup>1</sup>H NMR spectrum of compound **3** in DMSO-*d*<sub>6</sub>.

20160509-19-542  
1H 20160509-19-542

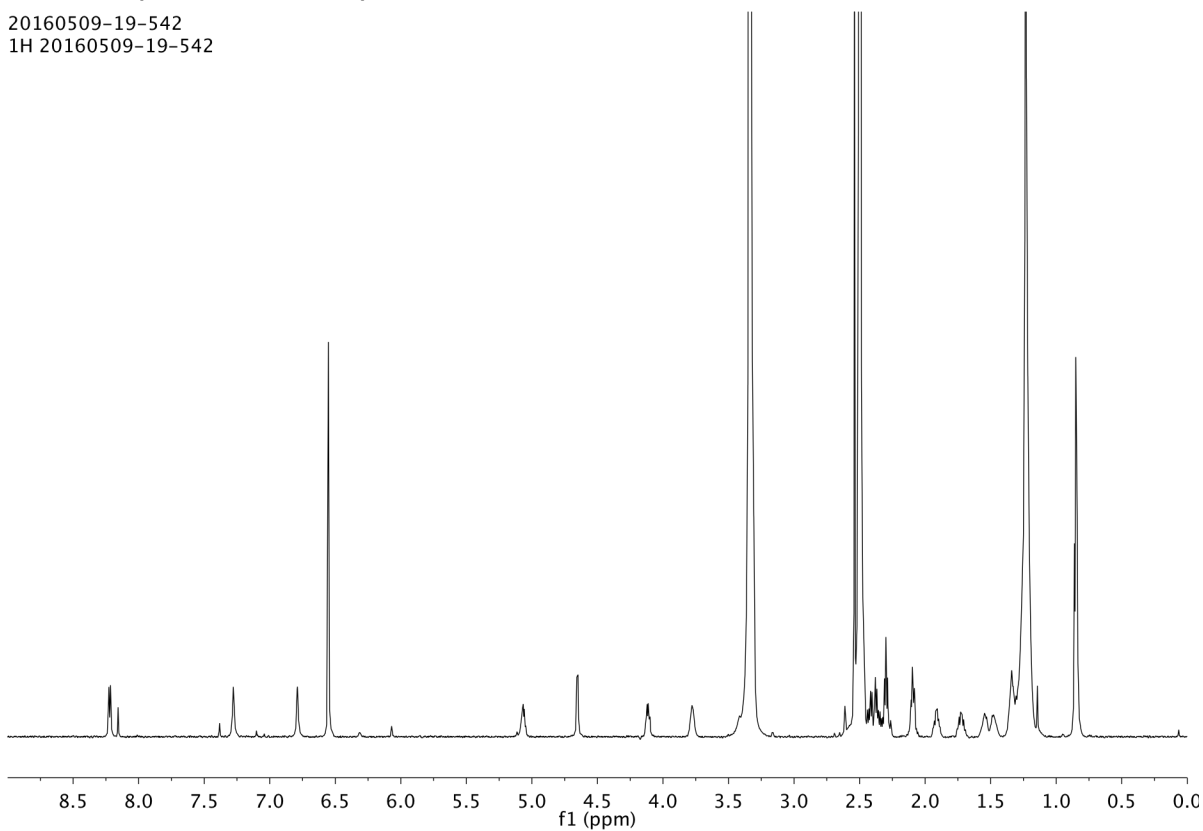

3  
4  
5 <sup>13</sup>C NMR spectrum of compound **3** in DMSO-*d*<sub>6</sub>.

20160509-19-542  
13C 20160509-19-542

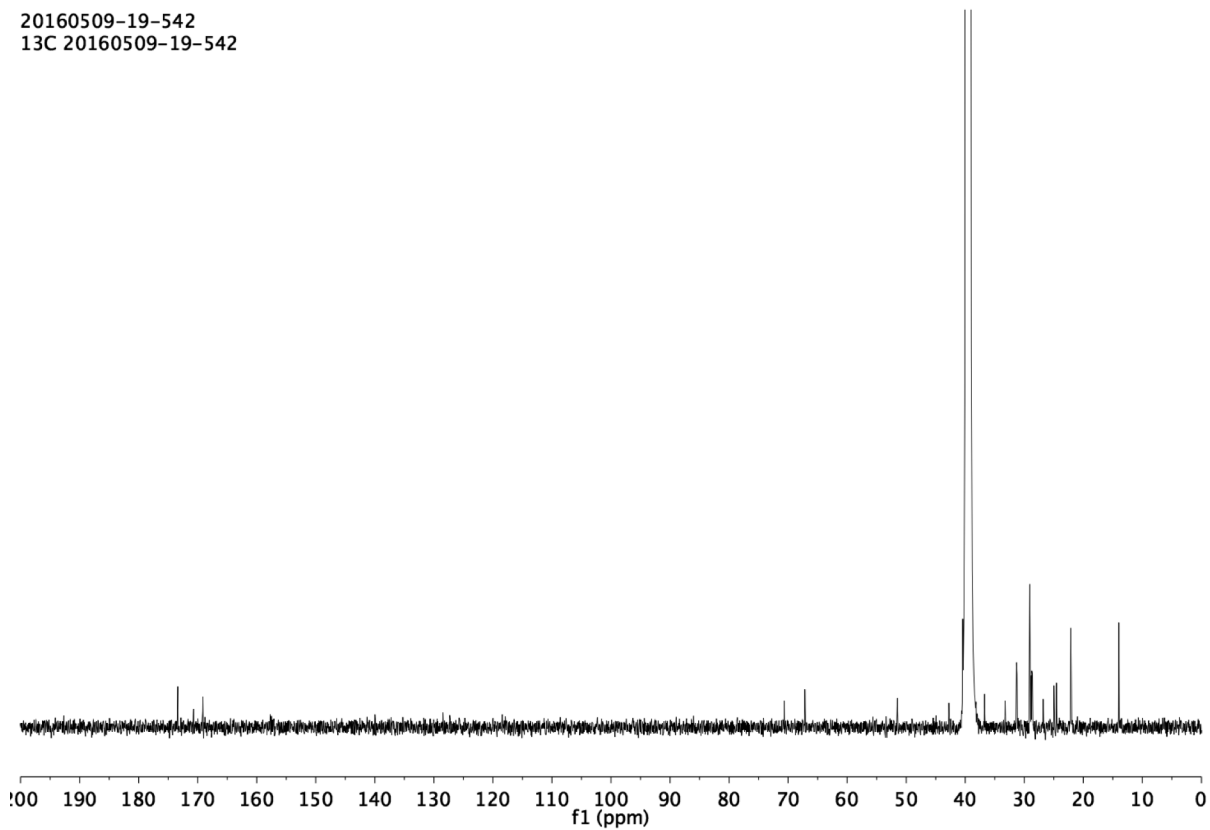

6  
7  
8



1 COSY spectrum of compound **3** in DMSO- $d_6$ .

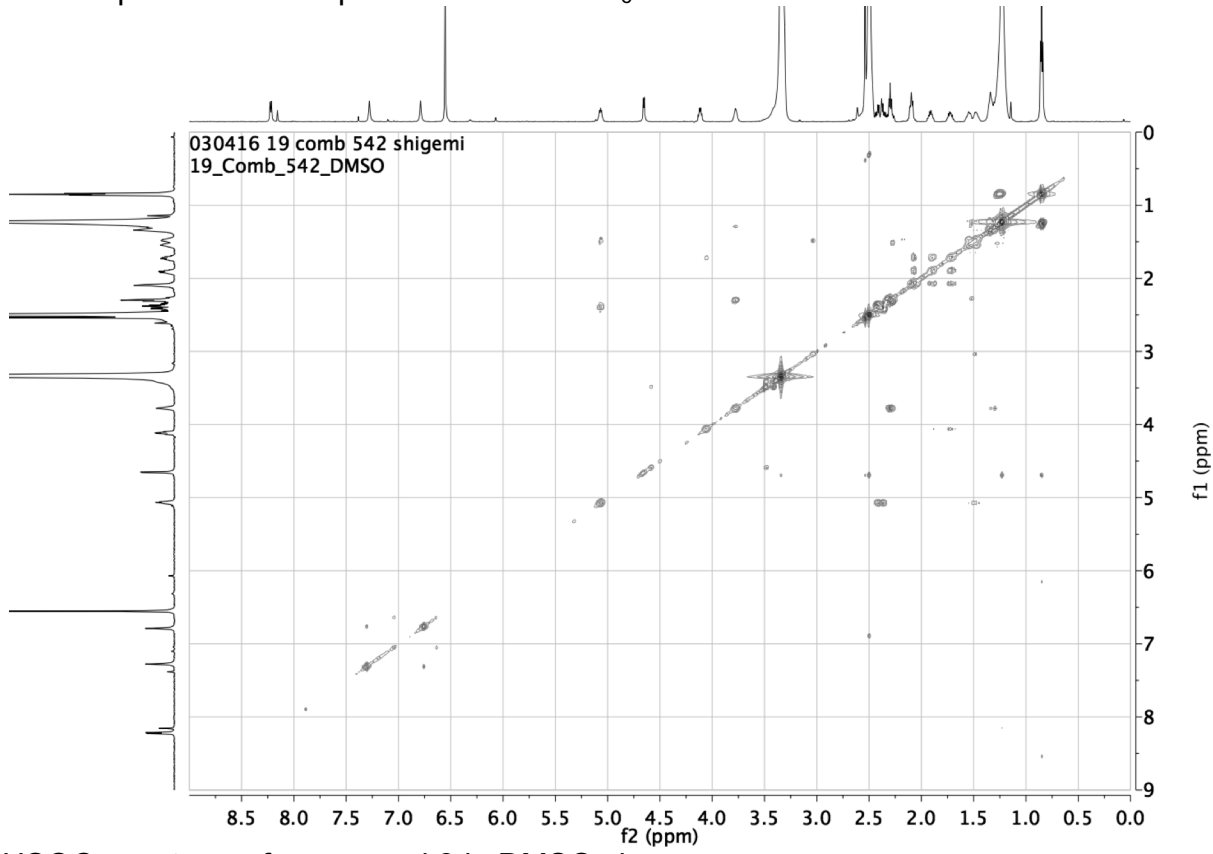

2  
3 HSQC spectrum of compound **3** in DMSO- $d_6$ .

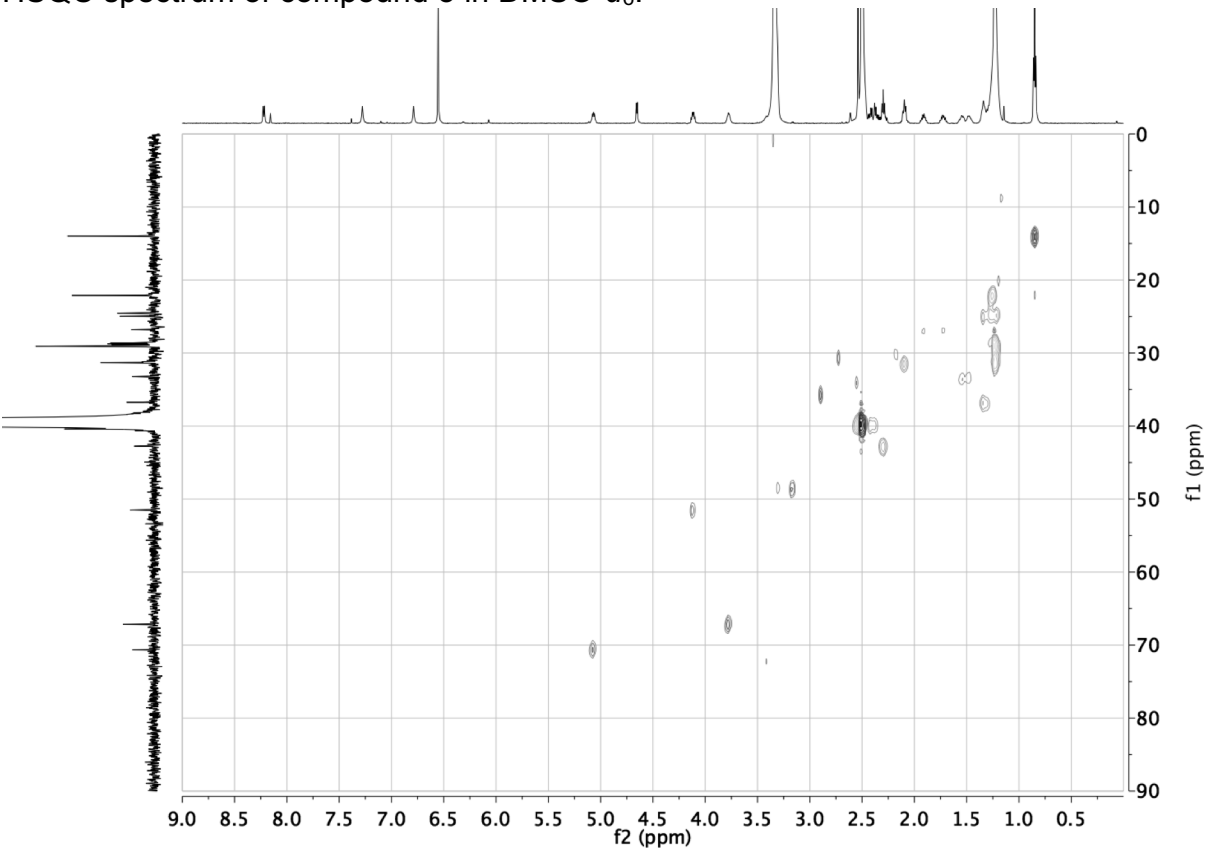

4  
5  
6

1 HMBC spectrum of compound 3 in DMSO-*d*<sub>6</sub>.

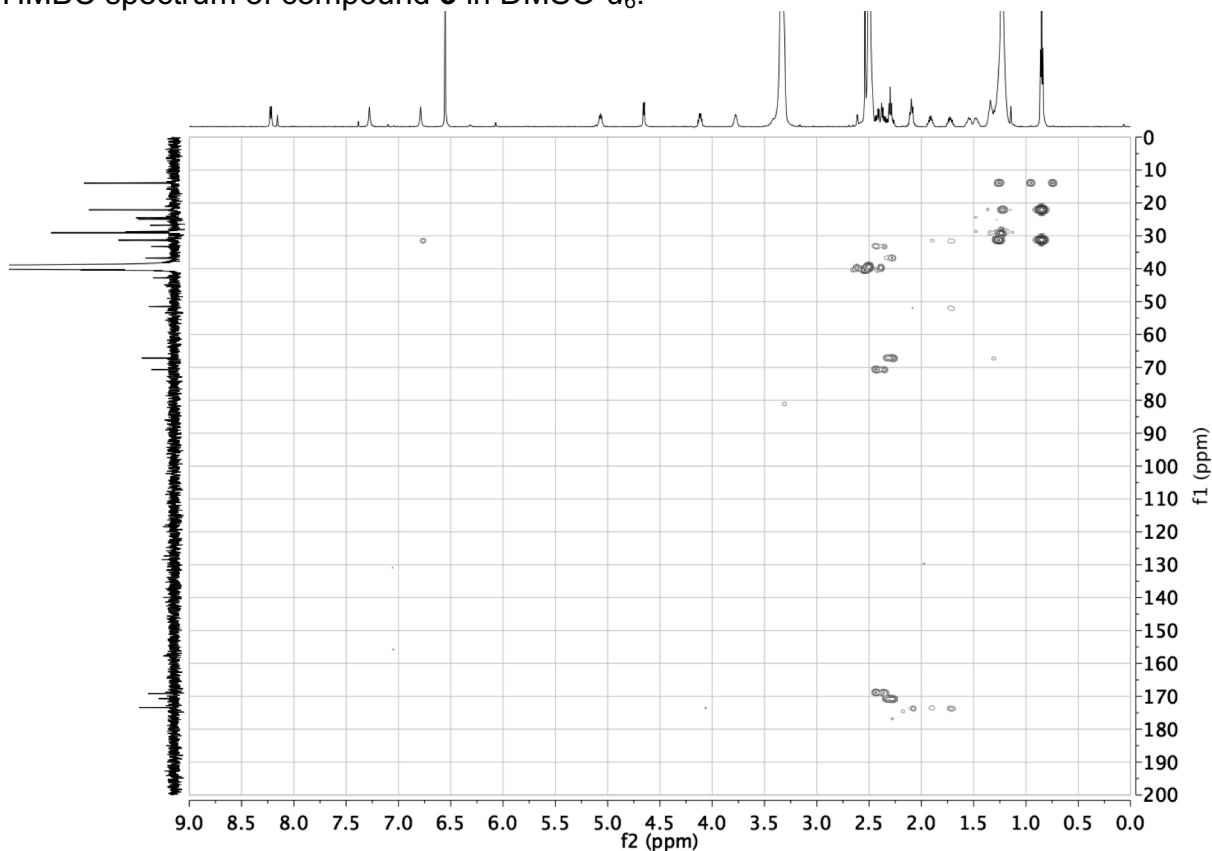

2  
3

4 HRESI-MS/MS fragmentation of compound 3

MS162680XL\_Louis\_Brady\_Sample\_POS2 #2618-2618 RT: 25.65-25.6  
T: FTMS + c ESI d Full ms2 543.40@cid35.00 [135.00-555.00] 10 NL: 3.23E6

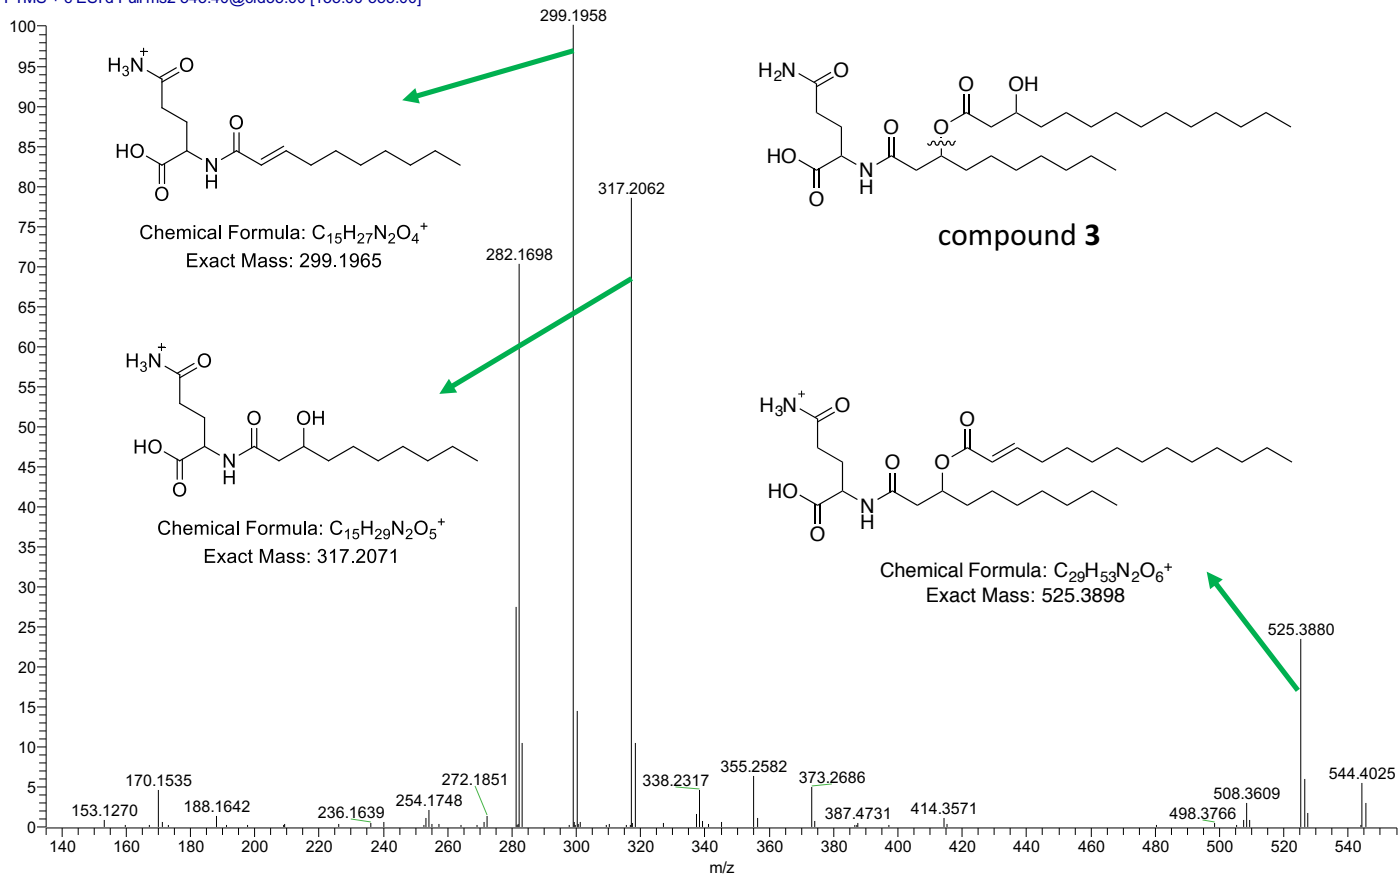

5  
6

1 **Family 4 – Compound 4a**

2 The major metabolite in family 4 (**4a**) was predicted by HRMS to have the following molecular formula:  
 3  $C_{24}H_{46}N_2O_4$  ( $m/z$ :  $[M+H]^+$  Calcd  $C_{24}H_{47}N_2O_4$  427.3536, found 427.3531). Through analysis of  $^1H$  and edited  
 4 HSQC spectra two olefinic protons, an oxymethine proton, a deshielded aliphatic methine proton, a terminal  
 5 methyl triplet proton and a group of overlapping aliphatic methylene ( $\delta_H$  1.24~1.22) were revealed. From the  
 6 COSY spectrum four spin systems were established. The 5 carbon spin system with COSY correlations from  
 7 H-1' to H<sub>2</sub>-6' along with empirical carbon and proton chemical shift data and HMBC correlations from H-1' ( $\delta_H$   
 8 3.80) to C-2' ( $\delta_C$  173.6) led to the construction of lysine. HMBC correlations from H<sub>2</sub>-2 to C-1 and from NH to C-  
 9 1 of HMBC indicated that the lysine as connected to a C-3 hydroxylated fatty acid moiety through an amide  
 10 bond. Based on the predicted molecular formula for compound **4a** the fatty acid side chain was determined to  
 11 be [C18:1]. The position of the double bond is predicted based on the position that is most frequently seen in  
 12 *E. coli* lipids and has been seen in other *N*-acyl amino acids heterologously produced in *E. coli*.<sup>1</sup> Thus, the  
 13 structure of **4a** was determined to be *N*-3-OH-oleoyl lysine.

14  
 15 NMR Table Compound **4a**

| Position | Compound <b>4a</b>     |                                   |
|----------|------------------------|-----------------------------------|
|          | $\delta_C$ , type      | $\delta_H$ , mult<br>( $J$ in Hz) |
| 1        | 170.0, C               |                                   |
| 2        | 43.8, CH <sub>2</sub>  | 2.16, m                           |
| 3        | 67.6, CH               | 3.73, m                           |
| 4        | 37.0, CH <sub>2</sub>  | 1.31, m                           |
| 5        | 28.7, CH <sub>2</sub>  | 1.22, m <sup>b</sup>              |
| 6        | 28.8, CH <sub>2</sub>  | 1.22, m <sup>b</sup>              |
| 7        | 29.0, CH <sub>2</sub>  | 1.22, m <sup>b</sup>              |
| 8        | 26.6, CH <sub>2</sub>  | 1.98, m                           |
| 9        | 129.6, CH <sub>2</sub> | 5.33, m                           |
| 10       | 129.6, CH <sub>2</sub> | 5.33, m                           |
| 11       | 26.6, CH <sub>2</sub>  | 1.98, m                           |
| 12       | 29.0, CH <sub>2</sub>  | 1.22, m <sup>b</sup>              |
| 13       | 29.0, CH <sub>2</sub>  | 1.22, m <sup>b</sup>              |
| 14       | 29.0, CH <sub>2</sub>  | 1.22, m <sup>b</sup>              |
| 15       | 29.0, CH <sub>2</sub>  | 1.22, m <sup>b</sup>              |
| 16       | 31.1, CH <sub>2</sub>  | 1.24, m <sup>b</sup>              |
| 17       | 22.0, CH <sub>2</sub>  | 1.25, m                           |
| 18       | 13.9, CH <sub>3</sub>  | 0.85, t (7.0)                     |
| NH       |                        | 7.45, d (7.0)                     |
| 1'       | 53.3, CH               | 3.80, m                           |
| 2'       | 173.6, C               |                                   |
| 3'       | 31.4, CH <sub>2</sub>  | 1.62, 1.54, m                     |
| 4'       | 21.8, CH <sub>2</sub>  | 1.34, 1.25, m                     |
| 5'       | 27.5, CH <sub>2</sub>  | 1.65, 1.56, m                     |
| 6'       | 38.8, CH <sub>2</sub>  | 2.73, 2.71, m                     |

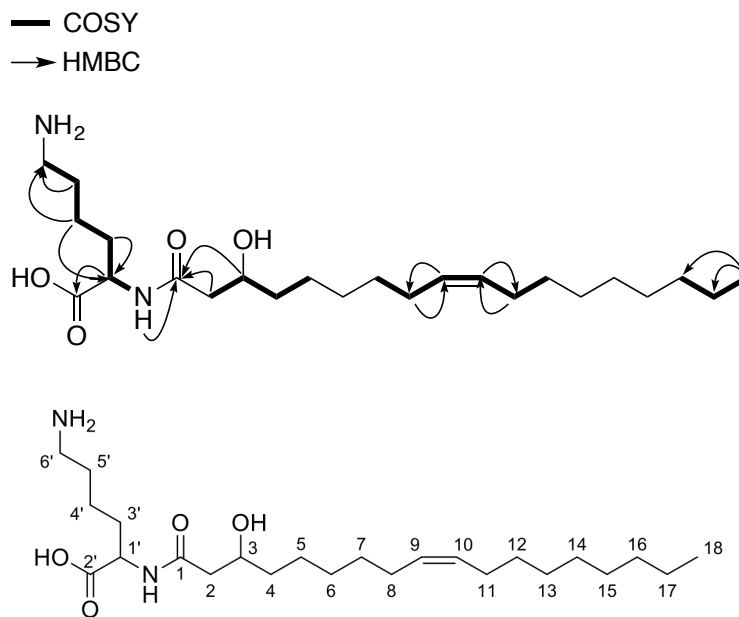

21 <sup>a</sup>600 MHz for  $^1H$  and 150 MHz for  $^{13}C$ , <sup>b</sup>overlapped signal

1  $^1\text{H}$  NMR spectrum of compound **4a** in  $\text{DMSO-}d_6$

20160701-36-426.1.fid  
H-20160701-36-426

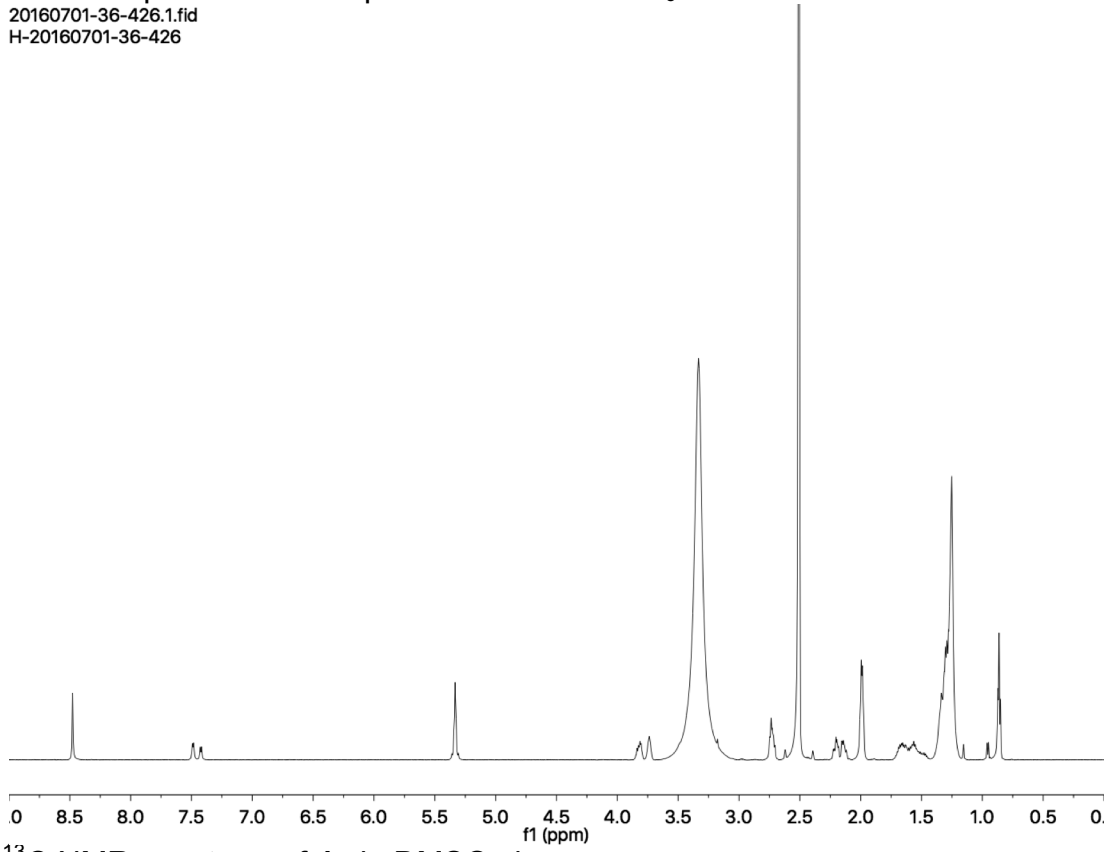

$^{13}\text{C}$  NMR spectrum of **4a** in  $\text{DMSO-}d_6$ .

20160701-36-426.5.fid  
C-20160701-36-426

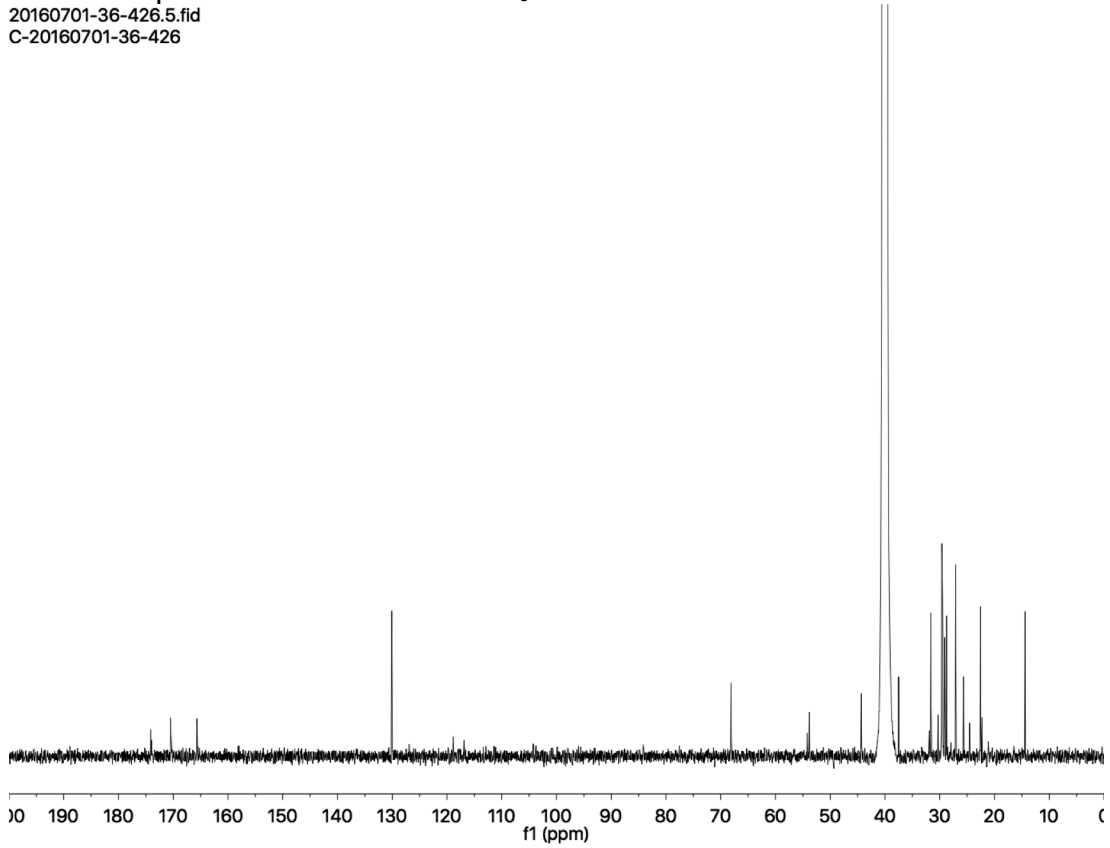

1 COSY NMR spectrum of **4a** in DMSO- $d_6$ .

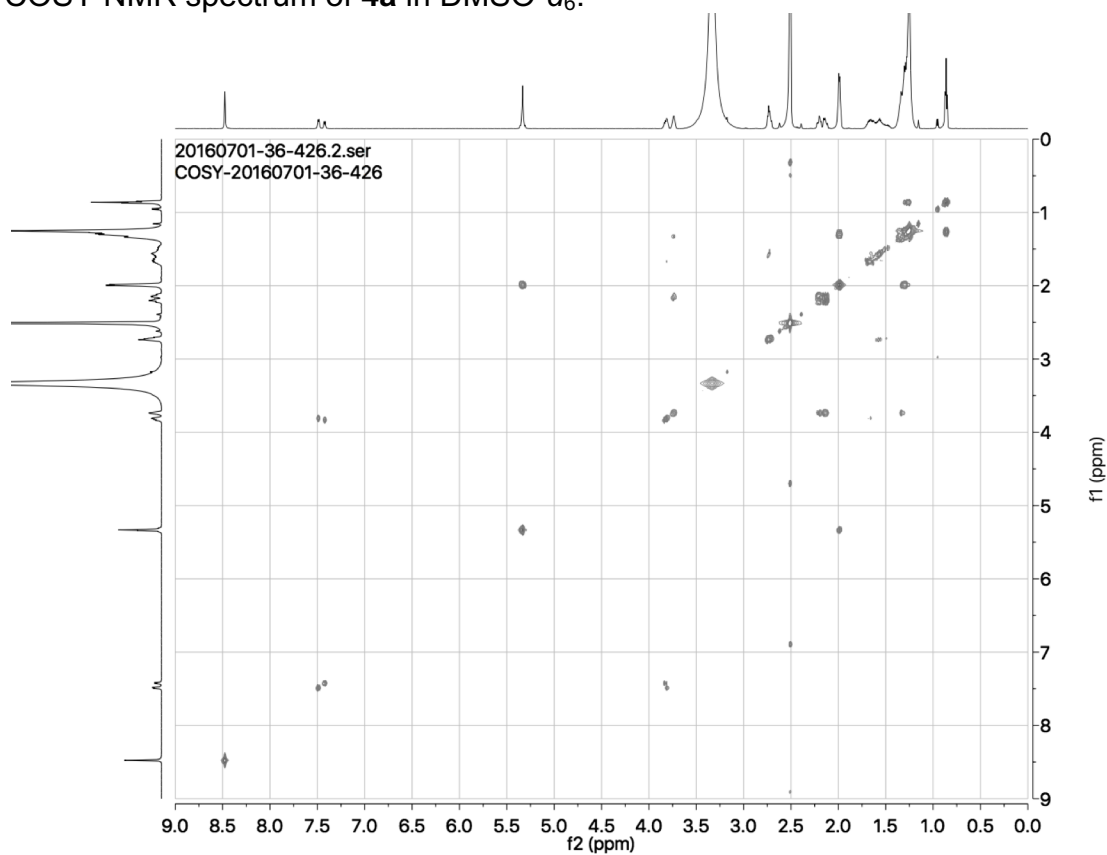

2  
3 HSQC spectrum of **4a** in DMSO- $d_6$ .

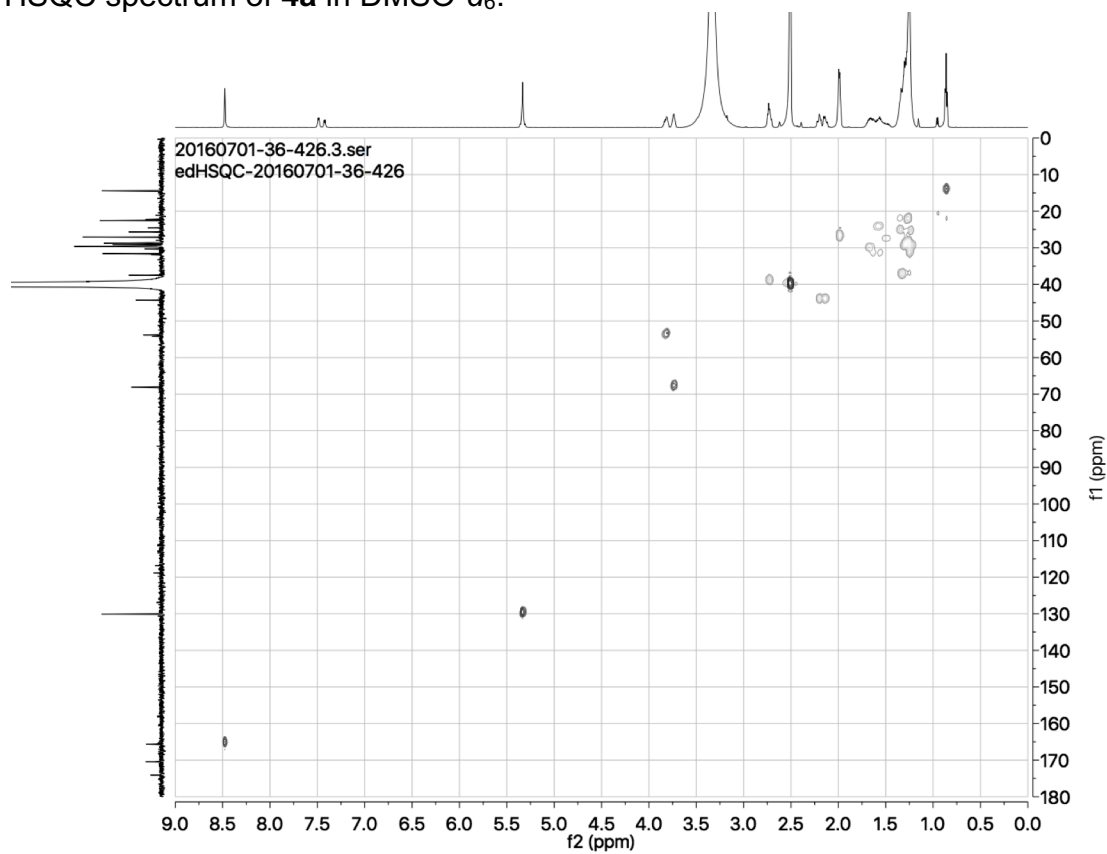

4  
5  
6  
7  
8

1 HMBC spectrum of **4a** in DMSO- $d_6$ .

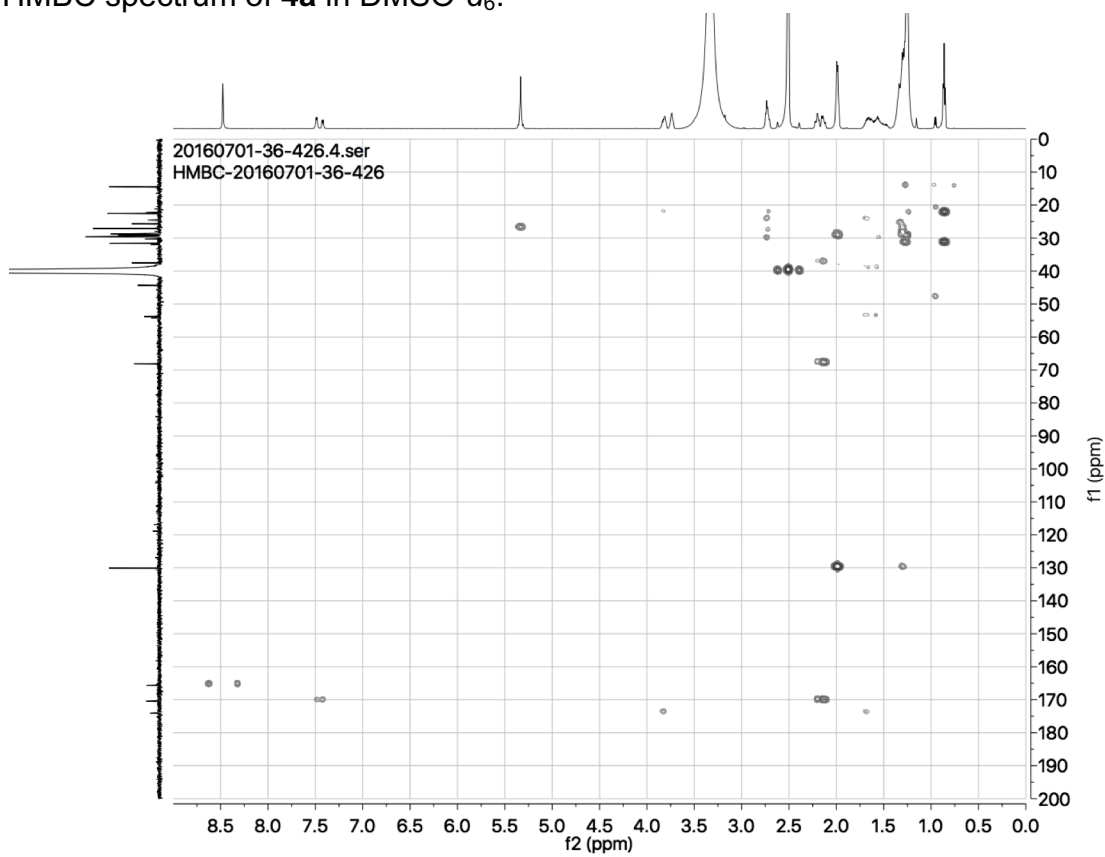

2  
3  
4

1 **Family 4 – compound 4b**

2 The second major *N*-acyl amide from family 4 by weight had an HRMS predicted molecular formula of  
 3  $C_{21}H_{42}N_2O_4$  (compound **4b**:  $m/z$ :  $[M+H]^+$  Calcd  $C_{21}H_{43}N_2O_4$  387.3223, found 387.3226). NMR spectra for **4b**  
 4 were nearly identical to those collected for **4a** with the exception of 1) the disappearance of the olefinic protons  
 5 in the  $^1H$  NMR and 2) the replacement of the 5-carbon-NH COSY spin system with a 4-carbon-NH COSY spin  
 6 system. Based on these differences and the HRMS predicted molecular formula for **4b** the structure of **4b** was  
 7 determined to be *N*-3-OH-palmitoyl ornithine.

8

9

10 **NMR Table Compound 4b**

11

| Position | Compound 4b <sup>a,c</sup> |                                              |
|----------|----------------------------|----------------------------------------------|
|          | $\delta_C$ , type          | $\delta_H$ , mult<br>( <i>J</i> in Hz)       |
| 1        | 170.8, C                   |                                              |
| 2        | 43.1, CH <sub>2</sub>      | 2.19, dd (7.5, 7.5)                          |
| 3        | 67.4, CH                   | 3.76, m                                      |
| 4        | 36.5, CH <sub>2</sub>      | 1.36, m <sup>b</sup><br>1.29, m <sup>b</sup> |
| 5        | 28.7, CH <sub>2</sub>      | 1.22, m <sup>b</sup>                         |
| 6        | 28.8, CH <sub>2</sub>      | 1.22, m <sup>b</sup>                         |
| 7        | 28.9, CH <sub>2</sub>      | 1.22, m <sup>b</sup>                         |
| 8        | 29.0, CH <sub>2</sub>      | 1.22, m <sup>b</sup>                         |
| 9        | 29.0, CH <sub>2</sub>      | 1.22, m <sup>b</sup>                         |
| 10       | 29.0, CH <sub>2</sub>      | 1.22, m <sup>b</sup>                         |
| 11       | 29.1, CH <sub>2</sub>      | 1.22, m <sup>b</sup>                         |
| 12       | 29.0, CH <sub>2</sub>      | 1.21, m <sup>b</sup>                         |
| 13       | 29.1, CH <sub>2</sub>      | 1.24, m <sup>b</sup>                         |
| 14       | 31.2, CH <sub>2</sub>      | 1.22, t (7.0)                                |
| 15       | 22.1, CH <sub>2</sub>      | 1.26, m                                      |
| 16       | 14.1, CH <sub>3</sub>      | 0.85, t (7.0)                                |
| NH       |                            | 7.98, d (7.0)                                |
| 1'       | 51.6, CH                   | 4.10, dq (7.5, 7.0)                          |
| 2'       | 174.3, C                   |                                              |
| 3'       | 28.5, CH <sub>2</sub>      | 1.74, d (7.5)<br>1.59,                       |
| 4'       | 23.8, CH <sub>2</sub>      | 1.58, m                                      |
| 5'       | 38.1, CH <sub>2</sub>      | 2.77, m                                      |
| 6'       |                            |                                              |

— COSY

→ HMBC

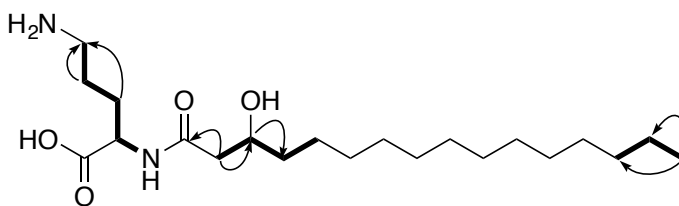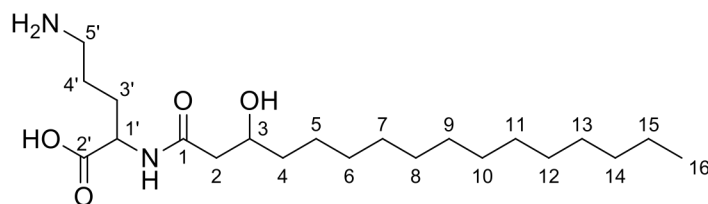

14 <sup>a</sup>600 MHz for  $^1H$ , <sup>b</sup>overlapped signal, <sup>c</sup>assigned from HMBC correlations

15

16

17

1  $^1\text{H}$  NMR spectrum of compound **4b** in  $\text{DMSO-}d_6$

010916\_36\_387\_DMSO  
36\_387\_DMSO\_proton

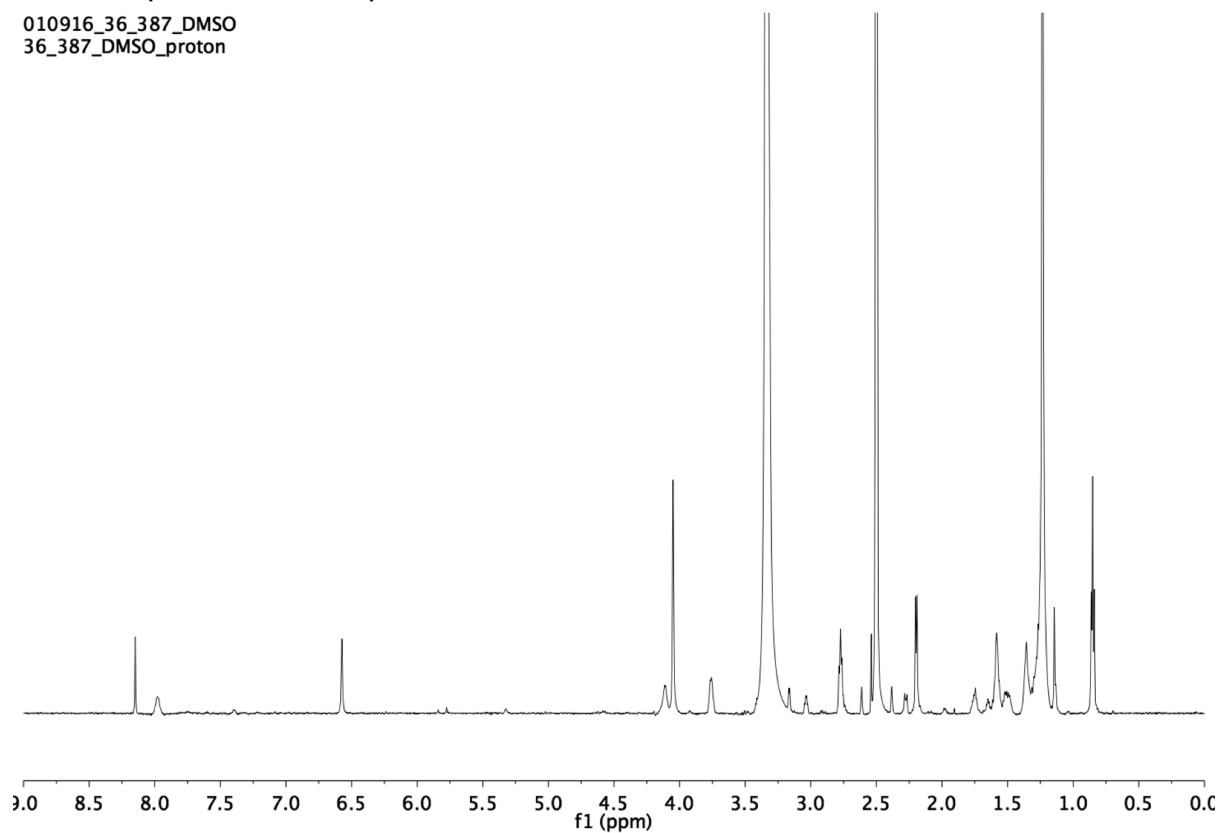

2  
3  
4 COSY spectrum of compound **4b** in  $\text{DMSO-}d_6$ .

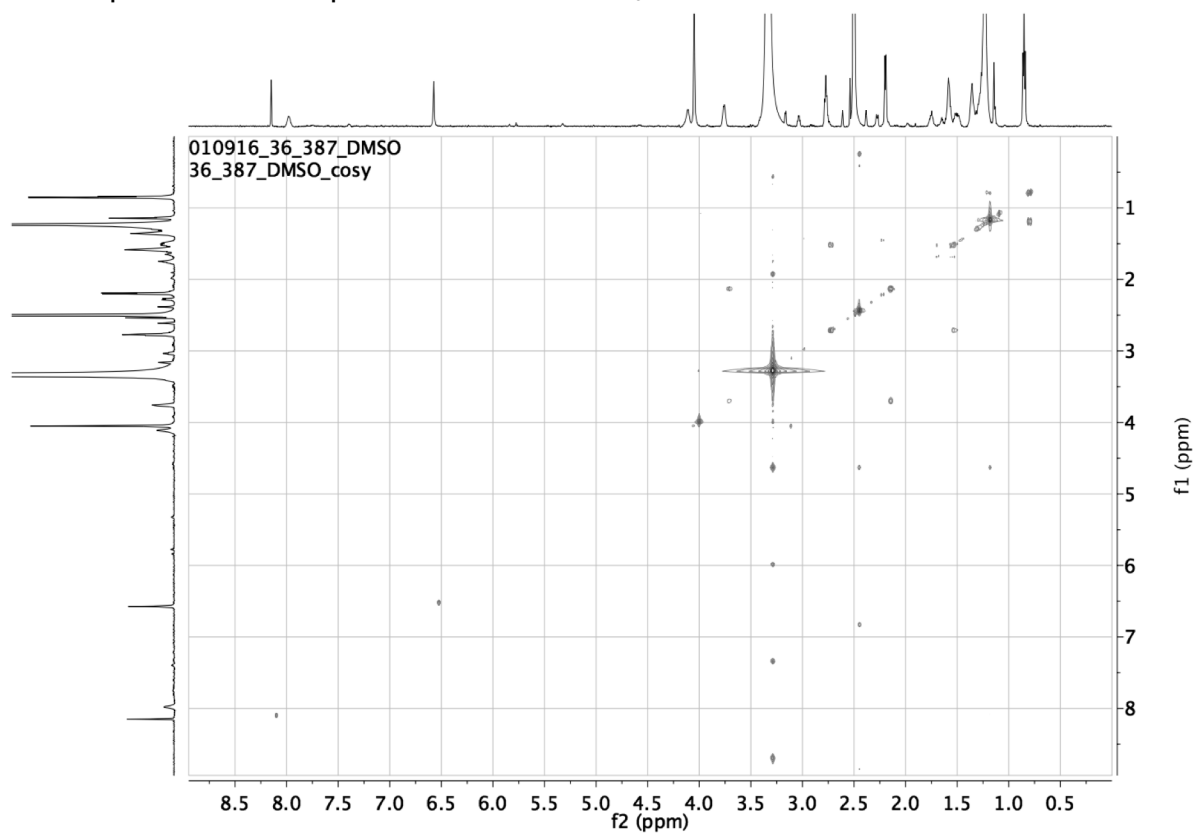

5  
6  
7  
8



1 HMQC spectrum of compound **4b** in DMSO- $d_6$ .

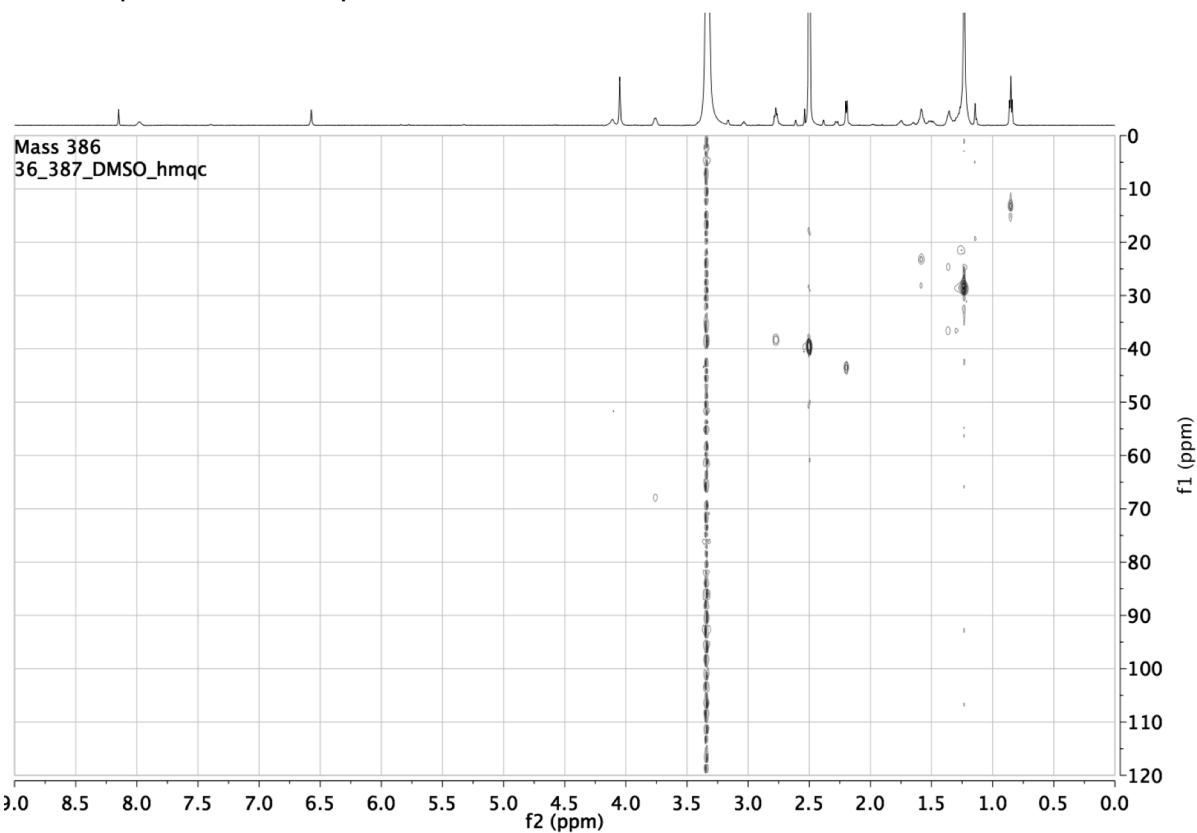

2  
3  
4 HMBC spectrum of compound **4b** in DMSO- $d_6$

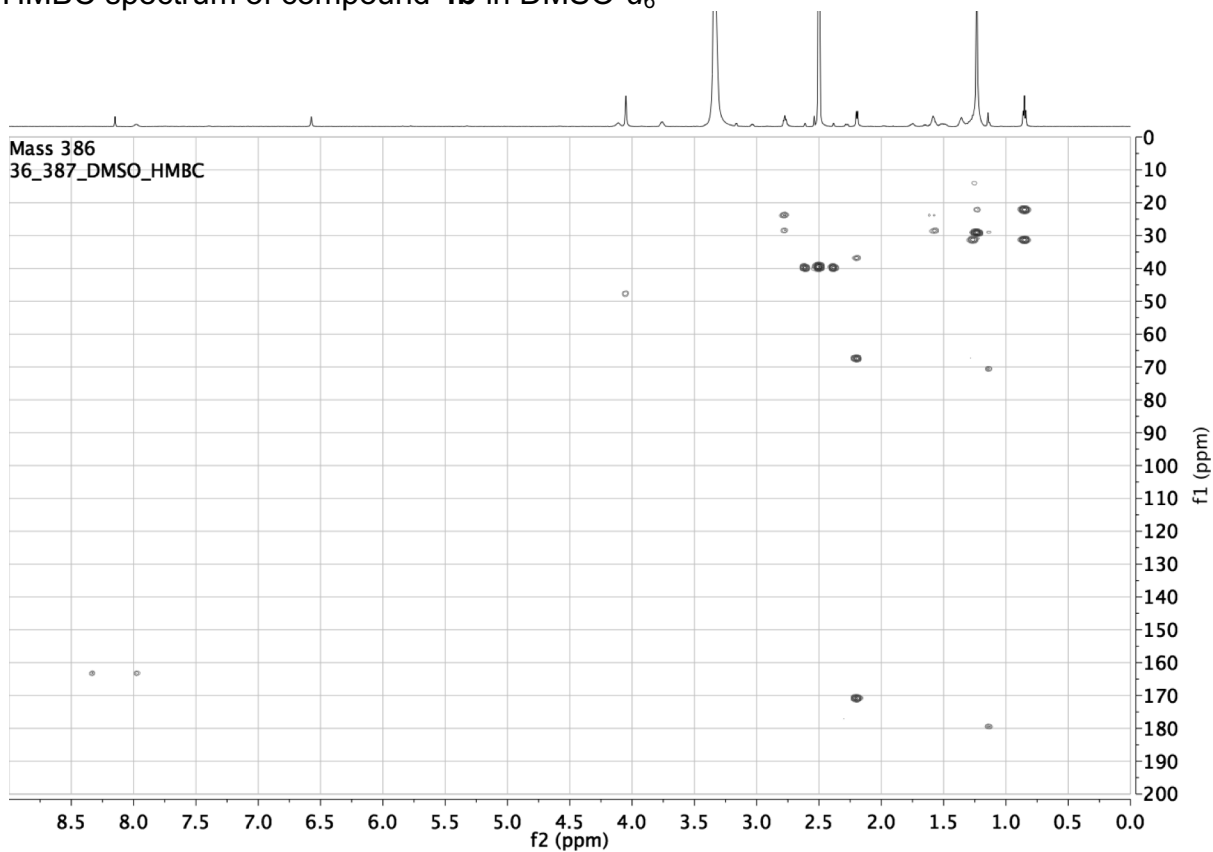

5  
6  
7

1 **Family 5 – compound 5**

2 The HRMS predicted molecular formula for compound **5** was C<sub>17</sub>H<sub>33</sub>NO<sub>3</sub> (*m/z*: [M+Na]<sup>+</sup> Calcd  
 3 C<sub>17</sub>H<sub>33</sub>NO<sub>3</sub>Na 322.2358, found 322.2356). The <sup>1</sup>H NMR spectrum of **5** exhibited chemical shifts characteristic  
 4 of a saturated fatty acid, a deshielded methine, 2 methyls (doublet and triplet) and a deshielded NH. The <sup>13</sup>C  
 5 NMR spectrum of **5** exhibited two clear carbonyl carbons and one predicted N-substituted carbon. Three spin  
 6 systems were observed in the COSY spectrum. HMBC correlations from the methyl doublet of a 2-carbon  
 7 COSY spin system to the carbonyl carbon (C-2') indicated the presence of an alanine in **5**. Empirical <sup>13</sup>C NMR  
 8 chemical shift data and HMBC correlations from H<sub>2</sub>-2 to C-1 and the NH proton to C-1 and C-1' indicated that  
 9 the fully saturated fatty acid was connected to the alanine through an amide bond. Based on the HRMS  
 10 predicted molecular formula for **5** the length of a fatty acid was determined to be C<sub>14</sub>. Thus, the structure of **5**  
 11 was determined to be *N*-myristoyl alanine.

12

13 NMR Table for Compound **5**

| Position | Compound <b>5</b> <sup>a</sup> |                                         |
|----------|--------------------------------|-----------------------------------------|
|          | δ <sub>C</sub> , type          | δ <sub>H</sub> , mult ( <i>J</i> in Hz) |
| 1        | 172.0, C                       |                                         |
| 2        | 35.0, CH <sub>2</sub>          | 2.07, dd (7.5, 7.5)                     |
| 3        | 25.2, CH <sub>2</sub>          | 1.45, m                                 |
| 4        | 28.6, CH <sub>2</sub>          | 1.22, m <sup>b</sup>                    |
| 5        | 28.7, CH <sub>2</sub>          | 1.22, m <sup>b</sup>                    |
| 6        | 28.8, CH <sub>2</sub>          | 1.22, m <sup>b</sup>                    |
| 7        | 28.9, CH <sub>2</sub>          | 1.22, m <sup>b</sup>                    |
| 8        | 29.0, CH <sub>2</sub>          | 1.22, m <sup>b</sup>                    |
| 9        | 29.0, CH <sub>2</sub>          | 1.22, m <sup>b</sup>                    |
| 10       | 29.0, CH <sub>2</sub>          | 1.22, m <sup>b</sup>                    |
| 11       | 29.1, CH <sub>2</sub>          | 1.22, m <sup>b</sup>                    |
| 12       | 31.3, CH <sub>2</sub>          | 1.21, m <sup>b</sup>                    |
| 13       | 22.1, CH <sub>2</sub>          | 1.24, m <sup>b</sup>                    |
| 14       | 14.0, CH <sub>3</sub>          | 0.85, t (7.0)                           |
| NH       |                                | 8.05, d (7.0)                           |
| 1'       | 47.3, CH                       | 4.15, dq (7.5, 7.0)                     |
| 2'       | 174.3, C                       |                                         |
| 3'       | 17.2, CH <sub>3</sub>          | 1.23, d (7.5)                           |

— COSY

→ HMBC

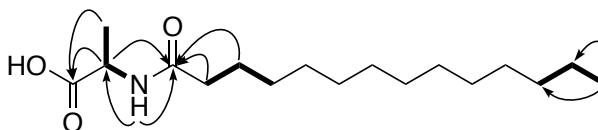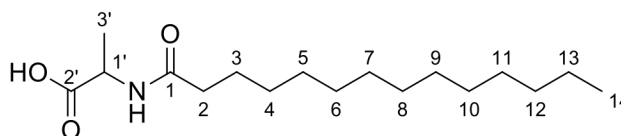

26 <sup>a</sup>600 MHz for <sup>1</sup>H and 150 MHz for <sup>13</sup>C, <sup>b</sup>overlapped signal

27

28

29

1  $^1\text{H}$  NMR spectrum of Compound **5** in  $\text{DMSO-}d_6$ .

Clone 43.1.fid  
43\_proton

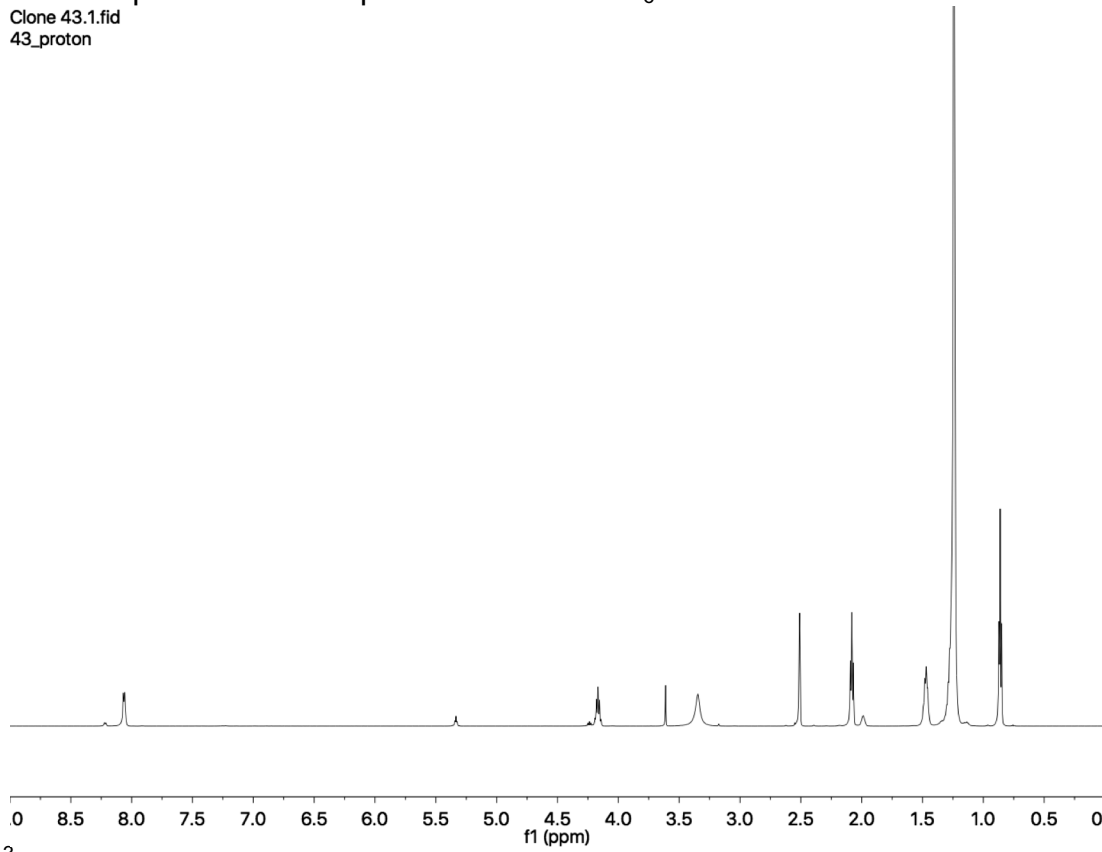

2  
3  $^{13}\text{C}$  NMR spectrum of Compound **5** in  $\text{DMSO-}d_6$ .

Clone 43.5.fid  
43\_carbon

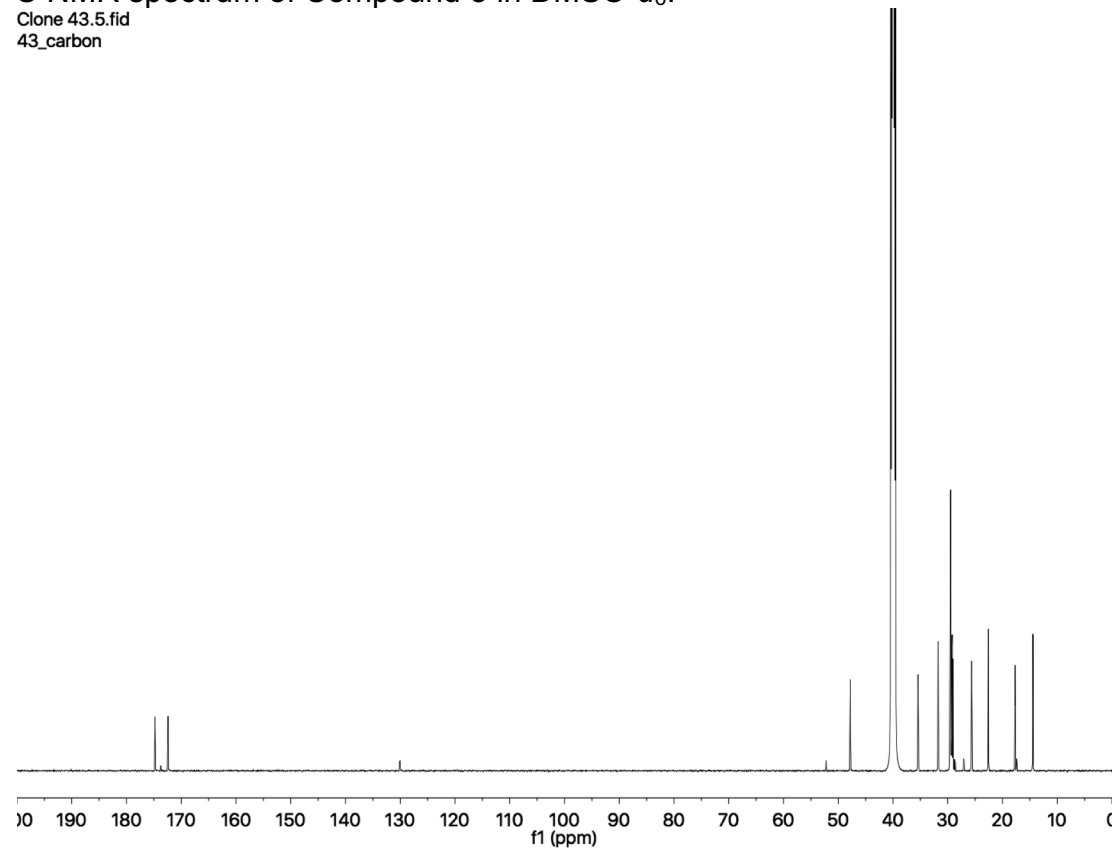

4  
5  
6  
7  
8

1 COSY spectrum of Compound **5** in DMSO- $d_6$

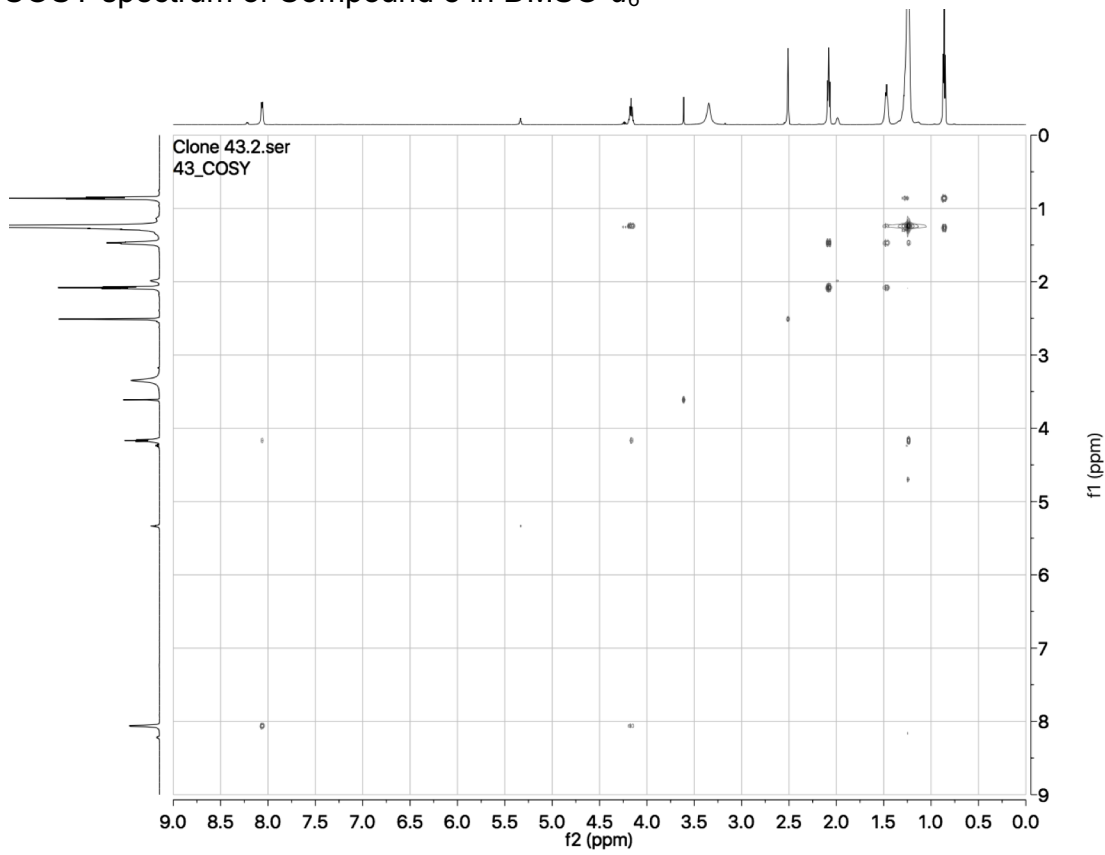

2  
3 HMQC spectrum of Compound **5** in DMSO- $d_6$ .

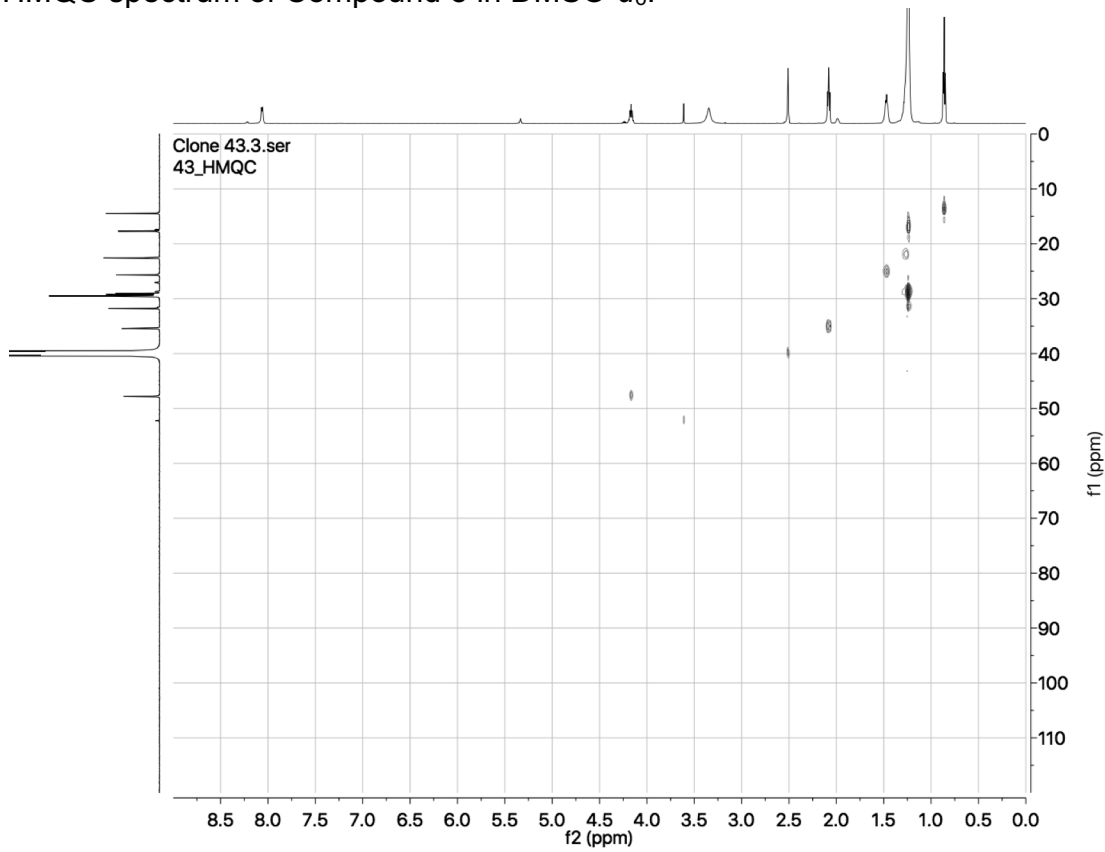

4  
5  
6  
7  
8

1 HMBC spectrum of Compound 5 in DMSO-d<sub>6</sub>.

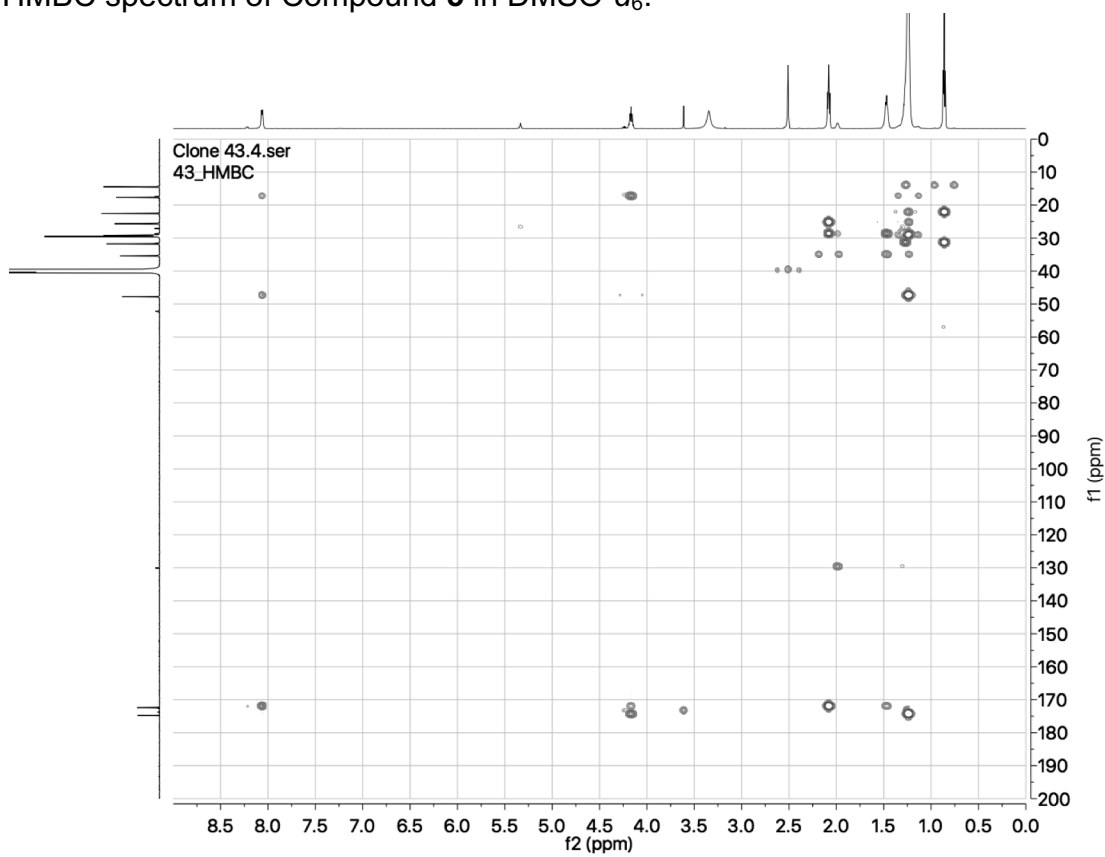

2  
3  
4  
5

1 **Family 6 – compound 6**

2 The HRMS predicted molecular formula for compound **6** was  $C_{19}H_{39}NO_3$  ( $m/z$ :  $[M+H]^+$  Calcd  $C_{19}H_{40}NO_3$   
 3 330.3008, found 330.3014). Analysis of the  $^1H$  NMR spectrum indicated the presence of a saturated fatty acid  
 4 moiety [e.g., overlapping aliphatic methylene proton signals ( $\delta_H$  1.23~1.21) and a terminal methyl triplet proton  
 5 triplet ( $\delta_H$  0.85)]. In the  $^{13}C$  and HMQC NMR spectra of **6** we observed one carbonyl carbon, two equivalent  
 6 oxymethylene carbons (C-2' and C-3') and a deshielded aliphatic methine carbon. Analysis of the COSY  
 7 spectrum identified three spin systems. Extensive COSY and HHMC (see figure below) correlations  
 8 established a serinol substructure. Based on HMBC correlations from NH to C-1 and C-1' and weak long-range  
 9 HMBC correlations from H-1' to C-1 the serinol was connected to the fatty acid through an amide bond. The  
 10 length of a fatty acid was determined as C16 based on the predicted molecular formula. Thus, the structure of  
 11 **6** was determined to be *N*-palmitoyl serinol.

12  
 13 **NMR Table Compound 6**

| Position | Compound 6 <sup>a</sup> |                                     |
|----------|-------------------------|-------------------------------------|
|          | $\delta_C$ , type       | $\delta_H$ , mult ( <i>J</i> in Hz) |
| 1        | 172.1, C                |                                     |
| 2        | 35.4, CH <sub>2</sub>   | 2.05, dd (7.5, 7.5)                 |
| 3        | 25.3, CH <sub>2</sub>   | 1.45, m                             |
| 4        | 28.7, CH <sub>2</sub>   | 1.21, m                             |
| 5        | 28.7, CH <sub>2</sub>   | 1.22, m <sup>b</sup>                |
| 6        | 28.8, CH <sub>2</sub>   | 1.22, m <sup>b</sup>                |
| 7        | 29.0, CH <sub>2</sub>   | 1.22, m <sup>b</sup>                |
| 8        | 29.0, CH <sub>2</sub>   | 1.22, m <sup>b</sup>                |
| 9        | 29.0, CH <sub>2</sub>   | 1.22, m <sup>b</sup>                |
| 10       | 29.0, CH <sub>2</sub>   | 1.22, m <sup>b</sup>                |
| 11       | 29.0, CH <sub>2</sub>   | 1.22, m <sup>b</sup>                |
| 12       | 29.0, CH <sub>2</sub>   | 1.22, m <sup>b</sup>                |
| 13       | 29.0, CH <sub>2</sub>   | 1.22, m <sup>b</sup>                |
| 14       | 31.3, CH <sub>2</sub>   | 1.22, m <sup>b</sup>                |
| 15       | 22.1, CH <sub>2</sub>   | 1.27, m <sup>b</sup>                |
| 16       | 14.0, CH <sub>3</sub>   | 0.85, t (7.0)                       |
| NH       |                         | 7.44, d (8.0)                       |
| 1'       | 52.7, CH                | 3.67, ddd (8.0, 5.5, 5.5)           |
| 2'       | 60.2, CH <sub>2</sub>   | 3.37, t (5.5)                       |
| 2'-OH    |                         | 4.57, t (5.5)                       |
| 3'       | 60.2, CH <sub>2</sub>   | 3.37, t (5.5)                       |
| 3'-OH    |                         | 4.57, t (5.5)                       |

— COSY  
 → HMBC

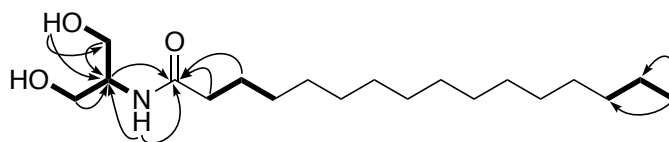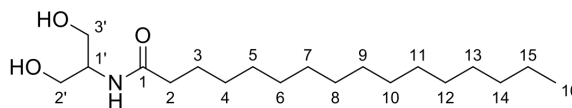

31 <sup>a</sup>600 MHz for  $^1H$  and 150 MHz for  $^{13}C$ , <sup>b</sup>overlapped signal

32  
 33  
 34

1  $^1\text{H}$  NMR spectrum of Compound **6** in  $\text{DMSO-}d_6$

2

Clone 57.1.fid  
57\_1

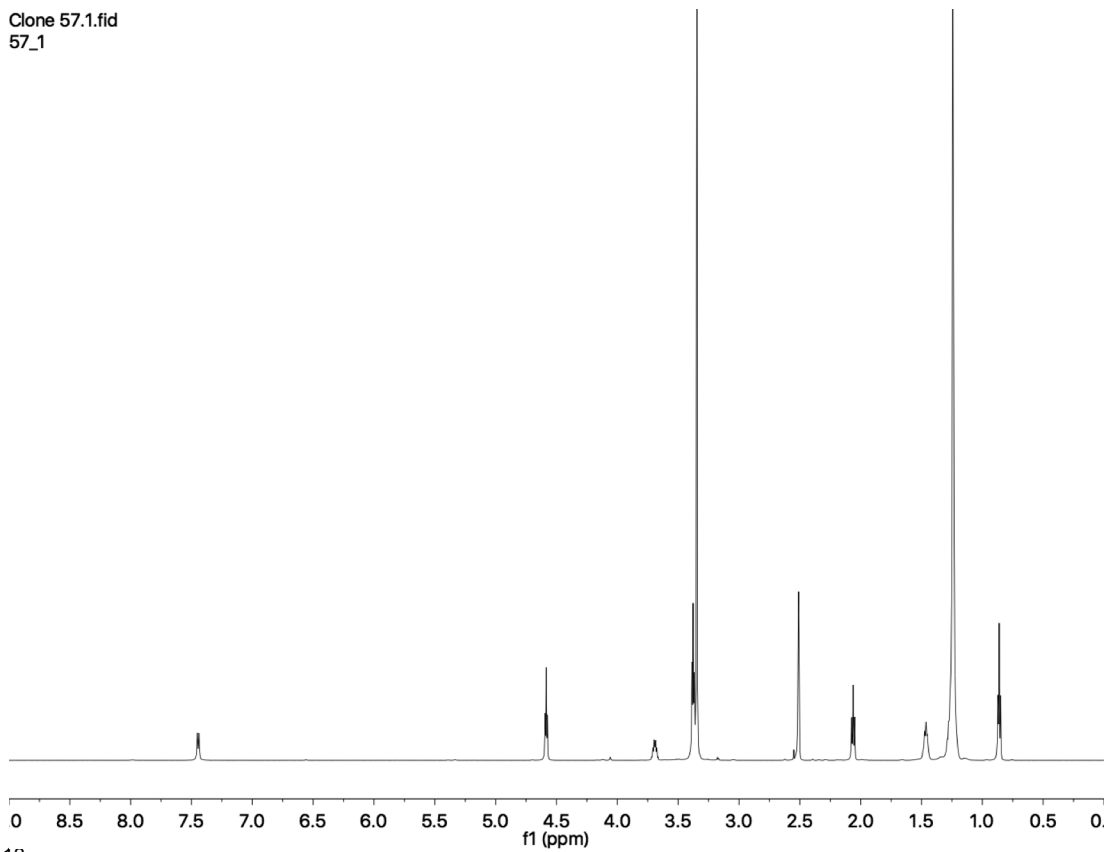

3

4  $^{13}\text{C}$  NMR spectrum of Compound **6** in  $\text{DMSO-}d_6$ .

Clone 57.5.fid  
Standard One-dimensional  $^{13}\text{C}$  experiment

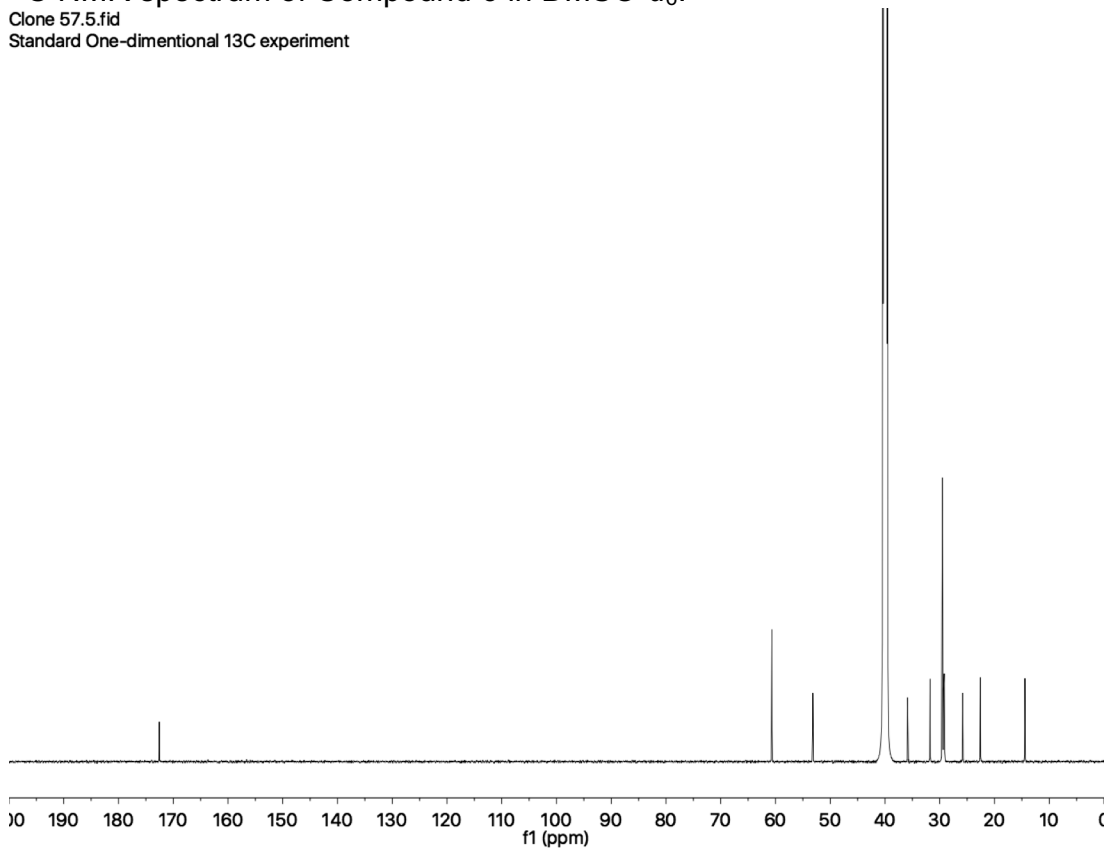

5

6

7

8

1 COSY spectrum of Compound **6** in DMSO- $d_6$

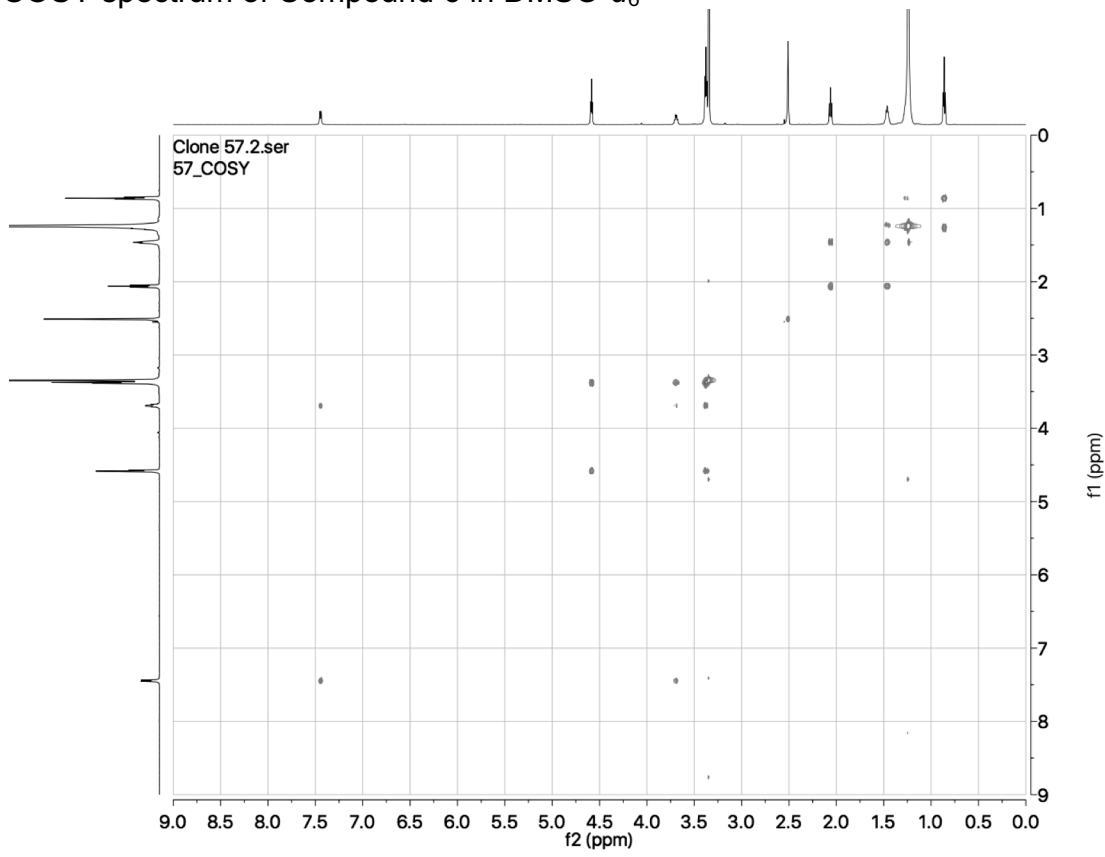

2  
3  
4  
5 HMQC spectrum of Compound **6** in DMSO- $d_6$ .

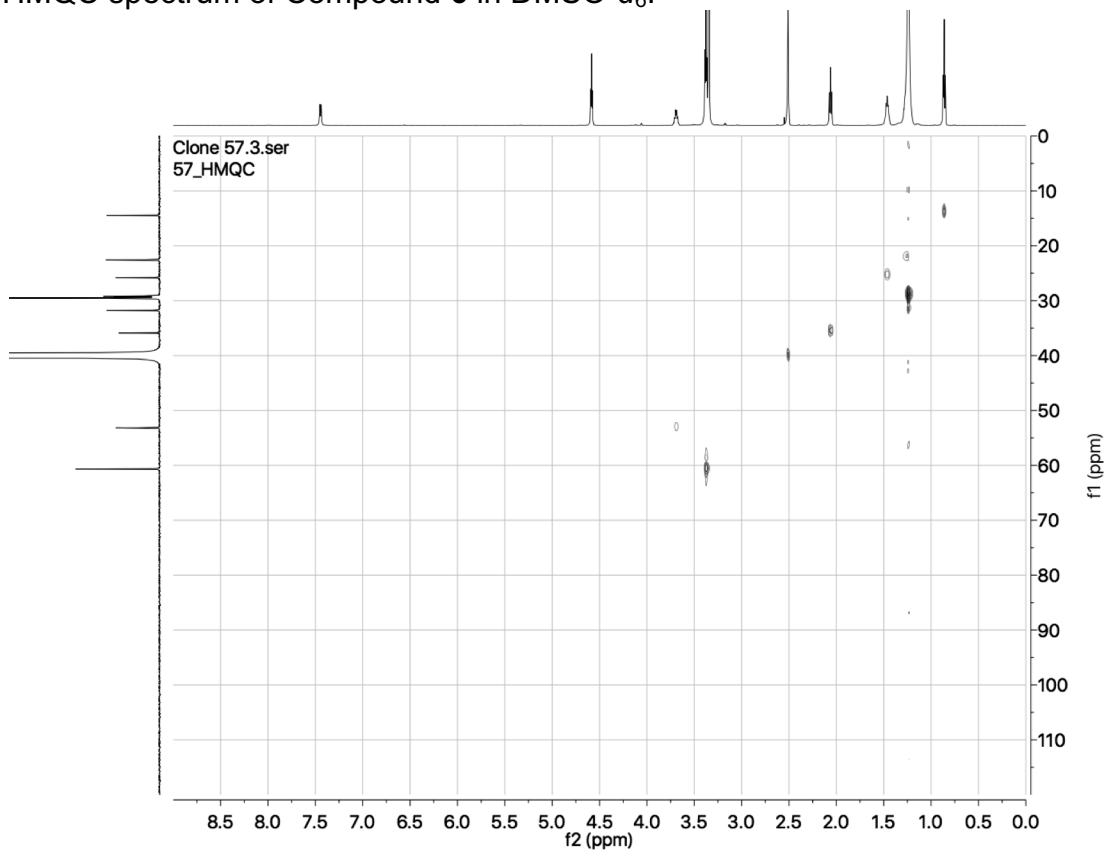

6  
7  
8



1 HMBC spectrum of Compound **6** in DMSO- $d_6$ .

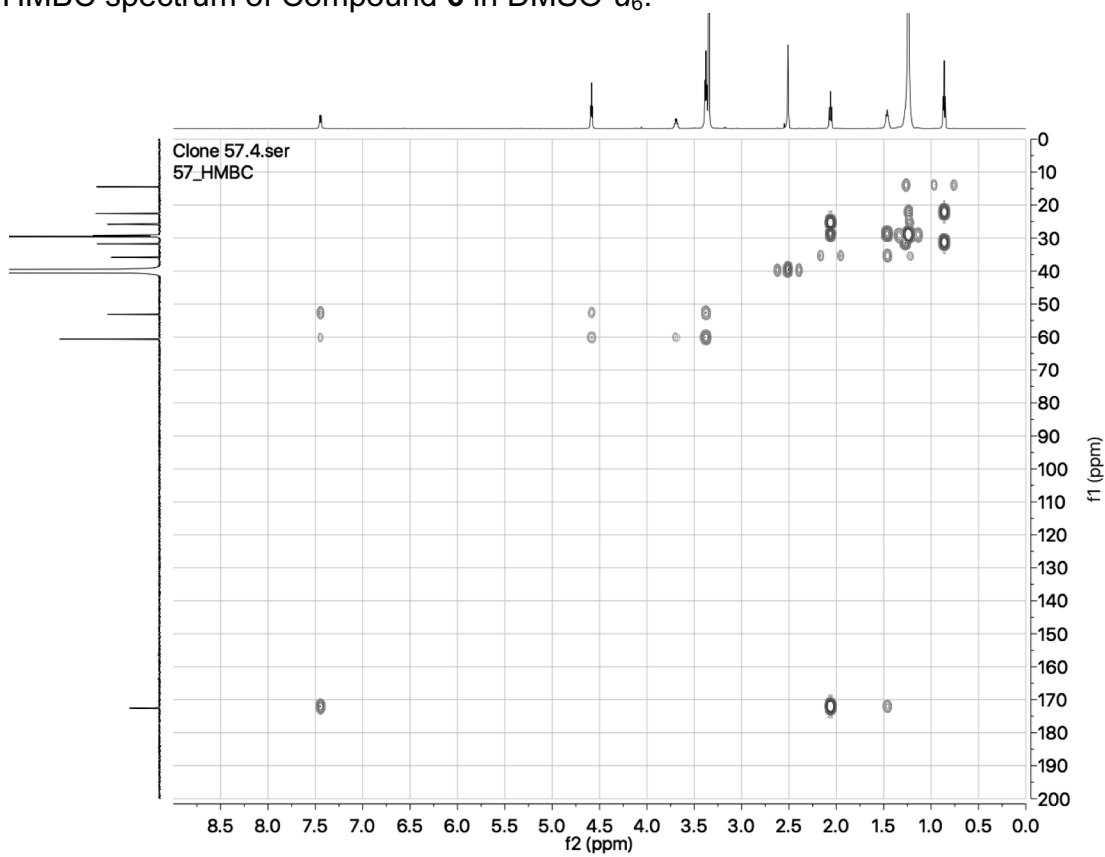

2  
3  
4

1 **Supplementary Info Tables**

2

3 **Supplementary Info Table 1.** hm-NAS Genes Selected for Heterologous Expression. This set included all hm-  
 4 NAS genes from clades sparsely populated with hm-NAS sequences and representative examples from clades  
 5 heavily populated with hm-NAS sequences.

6

| Clone Number | EBI Gene | Organism                                    | Gene Size (bp) | Molecule Family |
|--------------|----------|---------------------------------------------|----------------|-----------------|
| 1            | EFI7261  | Bacteroides oral 274 F0058                  | 1191           | No production   |
| 2            | EHB91285 | Alistipes indistinctus YUT 12060            | 921            | 1               |
| 3            | EEK17761 | Porphyromonas uenonis                       | 960            | No production   |
| 5            | EEY82825 | Bacteroides sp 2_1_33B                      | 987            | 1               |
| 6            | EHP49568 | Odoribacter laneus YIT 12061                | 969            | No production   |
| 7            | EHG23013 | Alloprevotella rava F0323                   | 1008           | 1               |
| 8            | EFA42931 | Prevotella bergensis DSM 17361              | 999            | 1               |
| 9            | EFL47029 | Prevotella disiens FB035                    | 1005           | 1               |
| 10           | EHO75052 | Prevotella micans F0438                     | 1005           | 1               |
| 11           | ADK95845 | Prevotella melaninogenica ATCC 25845        | 1011           | 1               |
| 12           | EFV04460 | Prevotella salivae DSM 15606                | 1017           | 1               |
| 13           | EHH01788 | Paraprevotella clara YIT 11850              | 945            | 1               |
| 14           | EDY97076 | Bacteroides plebius DSM 17135               | 1002           | 1               |
| 15           | CBW20928 | Bacteroides fragilis 638R                   | 1026           | 1               |
| 16           | EDS14876 | Bacteroides stercoris ATCC 43183            | 1035           | 1               |
| 17           | EDO52243 | Bacteroides uniformis ATCC 8492             | 990            | 1               |
| 18           | CBK67812 | Bacteroides xylanisolvens XB1A              | 1029           | 1               |
| 19           | ACI09609 | Klebsiella pneumonia 342                    | 1713           | 3               |
| 21           | ABV66681 | Acrobacter butzleri RM4018                  | 1716           | 2               |
| 24           | EHT12133 | Klebsiella oxytoca 10-5246                  | 1731           | 2               |
| 26           | EFE54303 | Providencia rettgeri DSM 1131               | 1743           | 2               |
| 27           | EFE94777 | Serratia odorifera DSM 4582                 | 1734           | 2               |
| 29           | EER56350 | Neisseria flavescens SK114                  | 768            | No production   |
| 30           | EET45812 | Neisseria sicca ATCC 29256                  | 783            | 4               |
| 31           | ACS62992 | Ralstonia pickettii 12D                     | 846            | 4               |
| 33           | BAH33083 | Rhodococcus erythropolis PR4                | 849            | No production   |
| 35           | EFG73978 | Mycobacterium parascrofulaceum ATCC BAA 614 | 870            | No production   |
| 36           | CAW29482 | Pseudomonas aeruginosa LESB58               | 768            | 4               |
| 37           | EFH13337 | Roseomonas cervicalis ATCC 49957            | 813            | 4               |
| 38           | EGP09383 | Bradyrhizobiaceae bacterium SG-6C           | 1041           | No production   |

|    |          |                                       |      |               |
|----|----------|---------------------------------------|------|---------------|
| 39 | EEV22085 | Enhydrobacter aerosaccus SK60         | 1011 | No production |
| 40 | EEY94333 | Acinetobacter junii SH205             | 789  | No production |
| 41 | EFF83269 | Acinetobacter haemolyticus ATCC 19194 | 789  | No production |
| 42 | CAP01857 | Acinetobacter baumannii SDF           | 816  | 4             |
| 43 | EGP10046 | Bradyrhizobiaceae bacterium SG-6C     | 804  | 5             |
| 50 | EFK33376 | Chryseobacterium gleum ATCC 35910     | 1854 | No production |
| 51 | EEK14630 | Capnocytophaga gingivalis ATCC 33624  | 1815 | No production |
| 52 | EFS97491 | Capnocytophaga ochracea F0287         | 1848 | 2             |
| 53 | CBK85930 | Enterobacter cloacae NCTC 9394        | 1713 | 2             |
| 54 | EHM48796 | Yokenella regensburgei ATCC 43003     | 1713 | 2             |
| 55 | EEK89350 | Bacillus cereus m1550                 | 1596 | No production |
| 56 | EHL05550 | Desulfitobacterium hafniense DP7      | 1638 | 6             |
| 57 | EFV76279 | Bacillus sp 2_A_57_CT2                | 1623 | 6             |
| 58 | GL883582 | Gemella Haemolysans M341              | 1576 | 6             |

1 **Supplementary Info Table 2. Reference Genome Analysis.** The phyla Bacteroidetes contained the largest  
2 number of reference genomes with hm-NAS genes (86/111 hm-NAS genes, families 1 and 2), while  
3 Proteobacterial species contained hm-NAS genes that encode for the greatest number of different *N*-acyl  
4 molecule families (families 2, 3, 4, 5). *N*-acyloxyacyl lysine hm-NAS genes (family 2) align to both  
5 Proteobacterial and Bacteroidetes species but hm-NAS genes from each phylum are present in distinct  
6 branches of the same clade (Fig 1a). Bacteroidetes are one of the most common phyla in the human  
7 microbiome, so it is not surprising that hm-NAS genes that map to Bacteroidetes species are the most  
8 abundant in patient samples (Fig. 1a). In comparison, hm-NAS genes that encode for *N*-acyl lysine/ornithine  
9 (Proteobacteria) and *N*-acyl serinol (Firmicutes) are comparatively rare in reference genomes. These rare  
10 genes are however, frequently found in patient samples because their carrier bacterial species are highly  
11 prevalent.<sup>44</sup>

12  
13

| PFAM13444 Gene                                                          | N-acyl Amide Molecule Family | Body site*             | Phyla         | Score | E-Value   | % Identity | Length | HMP reference genome**                           |
|-------------------------------------------------------------------------|------------------------------|------------------------|---------------|-------|-----------|------------|--------|--------------------------------------------------|
| R6A3N1_9BACT/51-156                                                     | 1                            | Oral                   | Bacteroidetes | 110   | 2.00E-22  | 76.88      | 199    | >ADDV01000044<br>Prevotella oris C735            |
| R6EH40_9BACT/51-155                                                     | 1                            | Oral                   | Bacteroidetes | 281   | 3.00E-74  | 72.53      | 892    | >ADDV01000044<br>Prevotella oris C735            |
| R7PBT6_9BACT/52-156                                                     | 1                            | Oral                   | Bacteroidetes | 58.4  | 6.00E-07  | 100        | 31     | >ADCT01000041<br>Prevotella sp. C561             |
| R7NN97_9BACE/51-155                                                     | 1                            | Gastrointestinal_tract | Bacteroidetes | 1790  | 0         | 99.59      | 981    | >AQHY01000032<br>Bacteroides massiliensis B84634 |
| A0A0C3RD59_9PORP/51-157                                                 | 1                            | Gastrointestinal_tract | Bacteroidetes | 82.4  | 4.00E-13  | 82.8       | 93     | >GG705232<br>Bacteroides sp. 3_1_33FAA           |
| A6L081_BACV8/51-155                                                     | 1                            | Gastrointestinal_tract | Bacteroidetes | 1807  | 0         | 99.9       | 981    | >ADKO01000098<br>Bacteroides vulgatus PC510      |
| A6LEV2_PARD8/51-155                                                     | 1                            | Gastrointestinal_tract | Bacteroidetes | 1762  | 0         | 99.28      | 975    | >ACPW01000045<br>Parabacteroides sp. D13         |
| D4IM11_9BACT/57-158                                                     | 1                            | Gastrointestinal_tract | Bacteroidetes | 1868  | 0         | 100        | 1011   | >ADKO01000098<br>Bacteroides vulgatus PC510      |
| D5EVS3_PRER2/52-157                                                     | 1                            | Gastrointestinal_tract | Bacteroidetes | 459   | 2.00E-126 | 75.3       | 996    | >DS995534<br>Bacteroides dorei DSM 17855         |
| D6D060_9BACE/51-155                                                     | 1                            | Gastrointestinal_tract | Bacteroidetes | 1879  | 0         | 100        | 1017   | >GG705232<br>Bacteroides sp. 3_1_33FAA           |
| E6SVI0_BACT6/51-155                                                     | 1                            | Gastrointestinal_tract | Bacteroidetes | 907   | 0         | 84.02      | 945    | >FP929032 Alistipes shahii WAL 8301              |
| CBK67812_CBK67812.1_Bacteroides_xylanisolvans_XB1A_hypothetical_protein | 1                            | Gastrointestinal_tract | Bacteroidetes | 1879  | 0         | 100        | 1017   | >GG703854 Prevotella copri DSM 18205             |
| ENA_CBW20928_CBW20928.1_Bacteroides_fragilis_638R_putative_hemolysin_A  | 1                            | Gastrointestinal_tract | Bacteroidetes | 1873  | 0         | 100        | 1014   | >FP929033 Bacteroides xylanisolvans XB1A         |
| ENA_EDO52243_EDO52243.1_Bacteroides_uniformis_ATCC_8492_hemolysin       | 1                            | Gastrointestinal_tract | Bacteroidetes | 1807  | 0         | 100        | 978    | >GL882689 Bacteroides fluxus YIT 12057           |
| ENA_EDS14876_EDS14876.1_Bacteroides_stercoris_ATCC_43183_hemolysin      | 1                            | Gastrointestinal_tract | Bacteroidetes | 1890  | 0         | 100        | 1023   | >FP929033 Bacteroides xylanisolvans XB1A         |
| ENA_EDY97076_EDY97076.1_Bacteroides_plebeius_DSM_17135_hemolysin        | 1                            | Gastrointestinal_tract | Bacteroidetes | 1829  | 0         | 100        | 990    | >JH636044 Bacteroides sp. 3_2_5                  |

|                                                                               |   |                        |               |      |           |       |      |                                                               |
|-------------------------------------------------------------------------------|---|------------------------|---------------|------|-----------|-------|------|---------------------------------------------------------------|
| ENA_EEY82825_EEY82825.1_Bacteroides_sp._2_1_33B_hemolysin                     | 1 | Gastrointestinal_tract | Bacteroidetes | 1801 | 0         | 100   | 975  | >ACPT01000029<br>Bacteroides sp. D20                          |
| ENA_EFV04460_EFV04460.1_Prevotella_salivae_DSM_15606_hemolysin                | 1 | Gastrointestinal_tract | Bacteroidetes | 1857 | 0         | 100   | 1005 | >ABFZ02000020<br>Bacteroides stercoris<br>ATCC 43183          |
| ENA_EHB91285_EHB91285.1_Alistipes_indistinctus_YIT_12060_hypothetical_protein | 1 | Gastrointestinal_tract | Bacteroidetes | 1679 | 0         | 100   | 909  | >ABQC02000004<br>Bacteroides plebeius<br>DSM 17135            |
| ENA_EHH01788_EHH01788.1_Paraprevotella_clara_YIT_11840_hemolysin              | 1 | Gastrointestinal_tract | Bacteroidetes | 1724 | 0         | 100   | 933  | >GG705151<br>Bacteroides sp.<br>2_1_33B                       |
| ENA_EHP49568_EHP49568.1_Odoribacter_laneus_YIT_12061_hypothetical_protein     | 1 | Gastrointestinal_tract | Bacteroidetes | 1768 | 0         | 100   | 957  | >GL629647 Prevotella<br>salivae DSM 15606                     |
| I3YLB0_ALIFI/56-157                                                           | 1 | Gastrointestinal_tract | Bacteroidetes | 941  | 0         | 84.58 | 953  | >JH370372 Alistipes<br>indistinctus YIT 12060                 |
| Q5LII1_BACFN/51-155                                                           | 1 | Gastrointestinal_tract | Bacteroidetes | 1873 | 0         | 100   | 1014 | >JH376579<br>Paraprevotella clara<br>YIT 11840                |
| Q8A247_BACTN/51-155                                                           | 1 | Gastrointestinal_tract | Bacteroidetes | 1873 | 0         | 100   | 1014 | >JH594596<br>Odoribacter laneus YIT<br>12061                  |
| R5C642_9BACE/51-155                                                           | 1 | Gastrointestinal_tract | Bacteroidetes | 436  | 8.00E-120 | 75.43 | 924  | >FP929032 Alistipes<br>shahii WAL 8301                        |
| R5FQF1_9BACT/53-157                                                           | 1 | Gastrointestinal_tract | Bacteroidetes | 416  | 1.00E-113 | 74.59 | 972  | >ACW01000002<br>Bacteroides sp.<br>2_1_56FAA                  |
| R5I942_9PORP/51-156                                                           | 1 | Gastrointestinal_tract | Bacteroidetes | 111  | 5.00E-22  | 74.23 | 291  | >JH636041<br>Bacteroides sp. 1_1_6                            |
| R5JGR8_9BACE/51-155                                                           | 1 | Gastrointestinal_tract | Bacteroidetes | 1823 | 0         | 99.6  | 999  | >KB905466<br>Bacteroides salyersiae<br>WAL 10018              |
| R5K71_9BACT/52-157                                                            | 1 | Gastrointestinal_tract | Bacteroidetes | 606  | 6.00E-171 | 78.43 | 955  | >GL629647 Prevotella<br>salivae DSM 15606                     |
| R5MMX8_9BACE/51-155                                                           | 1 | Gastrointestinal_tract | Bacteroidetes | 1768 | 0         | 98.99 | 987  | >ACWHO1000030<br>Bacteroides ovatus<br>3_8_47FAA              |
| R5NZ11_9BACT/51-155                                                           | 1 | Gastrointestinal_tract | Bacteroidetes | 1690 | 0         | 99.36 | 933  | >KB905466<br>Bacteroides salyersiae<br>WAL 10018              |
| R5UEV5_9BACE/51-155                                                           | 1 | Gastrointestinal_tract | Bacteroidetes | 1857 | 0         | 99.7  | 1014 | >JH379426 Prevotella<br>stercorea DSM 18206                   |
| R5UPI5_9PORP/51-157                                                           | 1 | Gastrointestinal_tract | Bacteroidetes | 1762 | 0         | 99.9  | 957  | >ABJL02000006<br>Bacteroides intestinalis<br>DSM 17393        |
| R5VW07_9BACE/51-155                                                           | 1 | Gastrointestinal_tract | Bacteroidetes | 1546 | 0         | 94.85 | 990  | >JH376579<br>Paraprevotella clara<br>YIT 11840                |
| R6B4U0_9BACT/52-156                                                           | 1 | Gastrointestinal_tract | Bacteroidetes | 726  | 0         | 80.02 | 991  | >AAVM02000009<br>Bacteroides caccae<br>ATCC 43185             |
| R6BXV9_9BACT/52-157                                                           | 1 | Gastrointestinal_tract | Bacteroidetes | 1707 | 0         | 97.87 | 987  | >GG703854 Prevotella<br>copri DSM 18205                       |
| R6DH15_9BACE/51-155                                                           | 1 | Gastrointestinal_tract | Bacteroidetes | 1120 | 0         | 86.61 | 1016 | >GG688329<br>Bacteroides finegoldii<br>DSM 17565              |
| R6FKP1_9BACE/51-155                                                           | 1 | Gastrointestinal_tract | Bacteroidetes | 789  | 0         | 81.18 | 983  | >DS499674<br>Bacteroides stercoris<br>ATCC 43183              |
| R6FUQ8_9BACT/52-158                                                           | 1 | Gastrointestinal_tract | Bacteroidetes | 1474 | 0         | 93.45 | 993  | >JH379426 Prevotella<br>stercorea DSM 18206                   |
| R6KTM3_9BACE/51-155                                                           | 1 | Gastrointestinal_tract | Bacteroidetes | 1807 | 0         | 99.7  | 987  | >ACCH01000127<br>Bacteroides<br>cellulosilyticus DSM<br>14838 |
| R6LJN9_9BACE/51-154                                                           | 1 | Gastrointestinal_tract | Bacteroidetes | 1812 | 0         | 99.8  | 987  | >AFBM01000001<br>Bacteroides clarus YIT<br>12056              |
| R6MX16_9BACE/51-155                                                           | 1 | Gastrointestinal_tract | Bacteroidetes | 817  | 0         | 81.75 | 981  | >DS981492<br>Bacteroides coprocola<br>DSM 17136               |
| R6QE29_9BACT/52-157                                                           | 1 | Gastrointestinal_tract | Bacteroidetes | 785  | 0         | 81.74 | 942  | >GG703854 Prevotella<br>copri DSM 18205                       |
| R6S950_9BACE/51-155                                                           | 1 | Gastrointestinal_tract | Bacteroidetes | 1862 | 0         | 99.8  | 1014 | >GG688329<br>Bacteroides finegoldii<br>DSM 17565              |
| R6SC61_9BACE/51-155                                                           | 1 | Gastrointestinal_tract | Bacteroidetes | 1807 | 0         | 99.8  | 984  | >ACBW01000097<br>Bacteroides<br>coprophilus DSM<br>18228      |
| R6VUA1_9BACT/56-157                                                           | 1 | Gastrointestinal_tract | Bacteroidetes | 970  | 0         | 85.5  | 931  | >FP929032 Alistipes<br>shahii WAL 8301                        |
| R6XGV7_9BACT/52-157                                                           | 1 | Gastrointestinal_tract | Bacteroidetes | 390  | 6.00E-106 | 74.54 | 923  | >GG703854 Prevotella<br>copri DSM 18205                       |
| R6YIB5_9BACE/51-155                                                           | 1 | Gastrointestinal_tract | Bacteroidetes | 442  | 2.00E-121 | 76.02 | 880  | >ACTC01000036<br>Bacteroides sp.<br>4_1_36                    |
| R7DDR3_9PORP/51-155                                                           | 1 | Gastrointestinal_tract | Bacteroidetes | 1657 | 0         | 98.31 | 945  | >ACWX01000035<br>Tannerella sp.<br>6_1_58FAA CT1              |

|                                                                                          |   |                        |               |      |           |       |      |                                                                     |
|------------------------------------------------------------------------------------------|---|------------------------|---------------|------|-----------|-------|------|---------------------------------------------------------------------|
| R7EIP8_9BACE/51-155                                                                      | 1 | Gastrointestinal_tract | Bacteroidetes | 1768 | 0         | 99.28 | 978  | >ACPT01000029<br>Bacteroides sp. D20                                |
| R7F021_9BACT/51-157                                                                      | 1 | Gastrointestinal_tract | Bacteroidetes | 76.8 | 2.00E-11  | 90    | 60   | >AFZZ01000132<br>Prevotella stercorea<br>DSM 18206                  |
| R7HSG0_9BACT/37-143                                                                      | 1 | Gastrointestinal_tract | Bacteroidetes | 126  | 2.00E-26  | 72.5  | 440  | >AFZZ01000132<br>Prevotella stercorea<br>DSM 18206                  |
| R7IYP9_9BACT/59-165                                                                      | 1 | Gastrointestinal_tract | Bacteroidetes | 233  | 1.00E-58  | 72.63 | 844  | >JH379426 Prevotella<br>stercorea DSM 18206                         |
| R7JHM4_9BACT/51-152                                                                      | 1 | Gastrointestinal_tract | Bacteroidetes | 1829 | 0         | 99.9  | 993  | >ABFK02000017<br>Alistipes putredinis<br>DSM 17216                  |
| E6K481_9BACT/52-156                                                                      | 1 | Oral                   | Bacteroidetes | 1834 | 0         | 100   | 993  | >AEPD01000010<br>Prevotella buccae<br>ATCC 33574                    |
| ENA_ADK95845_ADK95<br>845.1_Prevotella_melani<br>nogenica_ATCC_25845_<br>hemolysin       | 1 | Oral                   | Bacteroidetes | 1845 | 0         | 100   | 999  | >CP002122 Prevotella<br>melaninogenica ATCC<br>25845                |
| ENA_EFI17261_EFI1726<br>1.1_Bacteroidetes_oral_t<br>axon_274_str_F0058_he<br>molysin     | 1 | Oral                   | Bacteroidetes | 2176 | 0         | 100   | 1178 | >ADCM01000011<br>Bacteroidetes oral<br>taxon 274 str. F0058         |
| ENA_EHG23013_EHG23<br>013.1_Alloprevotella_rav<br>a_F0323_hypothetical_pr<br>oteins      | 1 | Oral                   | Bacteroidetes | 1840 | 0         | 100   | 996  | >JH376829 Prevotella<br>sp. oral taxon 302 str.<br>F0323            |
| ENA_EHO75052_EHO75<br>052.1_Prevotella_micans<br>_F0438_hypothetical_pro<br>tein         | 1 | Oral                   | Bacteroidetes | 1834 | 0         | 100   | 993  | >JH594521 Prevotella<br>micans F0438                                |
| F2KX19_PREDF/64-168                                                                      | 1 | Oral                   | Bacteroidetes | 1895 | 0         | 100   | 1026 | >CP002589 Prevotella<br>denticola F0289                             |
| F9D3S1_PREDD/52-<br>156_1                                                                | 1 | Oral                   | Bacteroidetes | 1879 | 0         | 100   | 1017 | >GL982488 Prevotella<br>dentalis DSM 3688                           |
| I1YUM9_PREI7/53-157                                                                      | 1 | Oral                   | Bacteroidetes | 364  | 1.00E-98  | 73.71 | 985  | >GG703886 Prevotella<br>oris F0302                                  |
| Q7MTR9_PORGI/53-158                                                                      | 1 | Oral                   | Bacteroidetes | 1801 | 0         | 100   | 975  | >AJZS01000078<br>Porphyromonas<br>gingivalis W50                    |
| R5CSR0_9BACT/52-157                                                                      | 1 | Oral                   | Bacteroidetes | 420  | 3.00E-115 | 75.28 | 906  | >AWEY01000007<br>Prevotella baroniae<br>F0067                       |
| R5GFN8_9BACT/51-155                                                                      | 1 | Oral                   | Bacteroidetes | 134  | 4.00E-29  | 70.21 | 866  | >ACZS01000081<br>Prevotella sp. oral<br>taxon 472 str. F0295        |
| R5Q4D6_9BACT/52-157                                                                      | 1 | Oral                   | Bacteroidetes | 392  | 6.00E-107 | 74.28 | 972  | >AWET01000051<br>Prevotella pleuritidis<br>F0068                    |
| R6W2Q2_9BACT/52-156                                                                      | 1 | Oral                   | Bacteroidetes | 569  | 3.00E-160 | 77.34 | 993  | >GL872283 Prevotella<br>multiformis DSM<br>16608                    |
| R7CYB8_9BACE/51-155                                                                      | 1 | Oral                   | Bacteroidetes | 87.9 | 3.00E-15  | 71.47 | 375  | >CP002122 Prevotella<br>melaninogenica ATCC<br>25845                |
| W0EP20_9PORP/51-155                                                                      | 1 | Oral                   | Bacteroidetes | 180  | 5.00E-43  | 71.8  | 773  | >AWEY01000007<br>Prevotella baroniae<br>F0067                       |
| C7M608_CAPOD/352-<br>453                                                                 | 2 | Oral                   | Bacteroidetes | 3230 | 0         | 98.42 | 1836 | >AMEV01000023<br>Capnocytophaga sp.<br>oral taxon 324 str.<br>F0483 |
| ENA_EEK14630_EEK14<br>630.1_Capnocytophaga_<br>gingivalis_ATCC_33624_<br>Acyltransferase | 2 | Oral                   | Bacteroidetes | 3330 | 0         | 100   | 1803 | >ACLQ01000018<br>Capnocytophaga<br>gingivalis ATCC 33624            |
| ENA_EFS97491_EFS97<br>491.1_Capnocytophaga_<br>ochracea_F0287_Acyltra<br>nsferase        | 2 | Oral                   | Bacteroidetes | 3391 | 0         | 100   | 1836 | >AKFV01000035<br>Capnocytophaga<br>ochracea str. Holt 25            |
| F9YU78_CAPCC/351-<br>452                                                                 | 2 | Oral                   | Bacteroidetes | 612  | 8.00E-173 | 73.1  | 1792 | >AMEV01000023<br>Capnocytophaga sp.<br>oral taxon 324 str.<br>F0483 |
| H1Z9S5_MYROD/346-<br>447                                                                 | 2 | Oral                   | Bacteroidetes | 172  | 2.00E-40  | 72.59 | 540  | >ALNN01000028<br>Capnocytophaga sp.<br>CM59                         |
| ENA_EFA42931_EFA42<br>931.1_Prevotella_bergen<br>sis_DSM_17361_hemoly<br>sin             | 1 | Oral                   | Bacteroidetes | 1823 | 0         | 100   | 987  | >GG704783 Prevotella<br>bergensis DSM 17361                         |
| A0A095ZG93_9BACT/52<br>-156                                                              | 1 | Oral                   | Bacteroidetes | 1596 | 0         | 95.41 | 1002 | >ADEG01000046<br>Prevotella buccalis<br>ATCC 35310                  |
| E7RNE3_9BACT/52-156                                                                      | 1 | Oral                   | Bacteroidetes | 1829 | 0         | 100   | 990  | >AEPE02000002<br>Prevotella oralis ATCC<br>33269                    |
| ENA_EEK17761_EEK17<br>761.1_Porphyromonas_u<br>enonis_60-3_hemolysin                     | 1 | Oral                   | Bacteroidetes | 1751 | 0         | 100   | 948  | >ACLR01000009<br>Porphyromonas<br>uenonis 60-3                      |
| ENA_EFL47029_EFL470<br>29.1_Prevotella_disiens_<br>FB035-09AN_hemolysin                  | 1 | Oral                   | Bacteroidetes | 1834 | 0         | 100   | 993  | >AED001000009<br>Prevotella disiens<br>FB035-09AN                   |

|                                                                                          |   |                        |                |      |           |       |      |                                                                         |
|------------------------------------------------------------------------------------------|---|------------------------|----------------|------|-----------|-------|------|-------------------------------------------------------------------------|
| F4KL89_PORAD/55-160                                                                      | 1 | Oral                   | Bacteroidetes  | 1735 | 0         | 99.48 | 954  | >AENO01000054<br>Porphyromonas<br>asaccharolytica<br>PR426713P-I        |
| I4Z8L9_9BACT/52-156                                                                      | 1 | Oral                   | Bacteroidetes  | 1829 | 0         | 100   | 990  | >ADFO01000053<br>Prevotella bivia<br>JCVIHMP010                         |
| R6CE12_9BACE/51-155                                                                      | 1 | Oral                   | Bacteroidetes  | 75   | 1.00E-11  | 72.32 | 289  | >AEDOO1000009<br>Prevotella disiens<br>FB035-09AN                       |
| R6XAK6_9BACT/52-156                                                                      | 1 | Oral                   | Bacteroidetes  | 436  | 1.00E-120 | 75.76 | 887  | >AEPE02000002<br>Prevotella oralis ATCC<br>33269                        |
| ENA_EHL05550_EHL05550.1_Desulfitobacterium_hafniense_DP7_aminotransferase_class_V        | 6 | Gastrointestinal_tract | Firmicutes     | 3003 | 0         | 100   | 1626 | >JH414482<br>Desulfitobacterium<br>hafniense DP7                        |
| ENA_EFV76279_EFV76279.1_Bacillus_sp._2_A_57_CT2_serine-pyruvate_aminotransferase         | 6 | Oral                   | Firmicutes     | 2976 | 0         | 100   | 1611 | >GL635754 Bacillus<br>sp. 2_A_57_CT2                                    |
| A6T596_KLEP7/322-423                                                                     | 2 | Oral                   | Proteobacteria | 3081 | 0         | 99.01 | 1719 | >JH930419 Klebsiella<br>pneumoniae subsp.<br>pneumoniae WGLW2           |
| D8MWX6_ERWBE/367-468                                                                     | 2 | Oral                   | Proteobacteria | 525  | 3.00E-147 | 73.37 | 1506 | >GG753567 Serratia<br>odorifera DSM 4582                                |
| ENA_EFE94777_EFE94777.1_Serratia_odorifera_DSM_4582_Acyltransferase                      | 2 | Oral                   | Proteobacteria | 3181 | 0         | 100   | 1722 | >GG753567 Serratia<br>odorifera DSM 4582                                |
| Q6CZN2_PECAS/322-423                                                                     | 2 | Oral                   | Proteobacteria | 399  | 2.00E-109 | 71.6  | 1634 | >ADBY01000051<br>Serratia odorifera DSM<br>4582                         |
| A0A0B5CH45_NEIEG/32-132                                                                  | 4 | Oral                   | Proteobacteria | 1386 | 0         | 100   | 750  | >ADBF01000232<br>Neisseria elongata<br>subsp. glycolytica<br>ATCC 29315 |
| E5UJR0_NEIMU/32-132                                                                      | 4 | Oral                   | Proteobacteria | 1397 | 0         | 100   | 756  | >ACRG01000005<br>Neisseria mucosa<br>C102                               |
| ENA_EET45812_EET45812.1_Neisseria_sicca_ATCC_29256_hypothetical_protein                  | 4 | Oral                   | Proteobacteria | 1424 | 0         | 100   | 771  | >ACKO02000002<br>Neisseria sicca ATCC<br>29256                          |
| ENA_ACIO9609_ACIO9609.1_Klebsiella_pneumoniae_342_conserved_hypothetical_protein         | 3 | Gastrointestinal_tract | Proteobacteria | 3059 | 0         | 99.12 | 1701 | >ACXA01000063<br>Klebsiella sp. 1_1_55                                  |
| A4W746_ENT38/322-423                                                                     | 2 | Gastrointestinal_tract | Proteobacteria | 1417 | 0         | 81.88 | 1689 | >FP929040<br>Enterobacter cloacae<br>subsp. cloacae NCTC<br>9394        |
| ENA_CBK85930_CBK85930.1_Enterobacter_cloacae_subsp._cloacae_NCTC_9394_Putative_hemolysin | 2 | Gastrointestinal_tract | Proteobacteria | 3142 | 0         | 100   | 1701 | >FP929040<br>Enterobacter cloacae<br>subsp. cloacae NCTC<br>9394        |
| ENA_EFE54303_EFE54303.1_Providencia_rettgeri_DSM_1131_Acyltransferase                    | 2 | Gastrointestinal_tract | Proteobacteria | 3197 | 0         | 100   | 1731 | >ACCI02000039<br>Providencia rettgeri<br>DSM 1131                       |
| ENA_EHM48796_EHM48796.1_Yokenella_regenburgei_ATCC_43003_Acyltransferase                 | 2 | Gastrointestinal_tract | Proteobacteria | 3142 | 0         | 100   | 1701 | >JH417874 Yokenella<br>regensburgei ATCC<br>43003                       |
| F9ZAJ4_ODOSD/341-443                                                                     | 2 | Gastrointestinal_tract | Proteobacteria | 1013 | 0         | 77.5  | 1738 | >JH594597<br>Odoribacter laneus YIT<br>12061                            |
| G9Z3T1_9ENTR/322-423                                                                     | 2 | Gastrointestinal_tract | Proteobacteria | 3142 | 0         | 100   | 1701 | >JH417874 Yokenella<br>regensburgei ATCC<br>43003                       |
| R5UYM1_9PORP/338-439                                                                     | 2 | Gastrointestinal_tract | Proteobacteria | 3314 | 0         | 99.89 | 1800 | >ADMC01000028<br>Odoribacter laneus YIT<br>12061                        |
| ENA_ACS62992_ACS62992.1_Ralstonia_pickettii_12D_conserved_hypothetical_protein           | 4 | Gastrointestinal_tract | Proteobacteria | 1541 | 0         | 100   | 834  | >GL520222 Ralstonia<br>sp. 5_7_47FAA                                    |
| ENA_CAW29482_CAW29482.1_Pseudomonas_aeruginosa_LESB58_putative_hemolysin                 | 4 | Gastrointestinal_tract | Proteobacteria | 1369 | 0         | 99.34 | 756  | >ACWU01000206<br>Pseudomonas sp.<br>2_1_26                              |
| A0A089UDH2_9ENTR/23-424                                                                  | 2 | Oral                   | Proteobacteria | 870  | 0         | 76.22 | 1695 | >ALNJ01000086<br>Klebsiella sp. OBRC7                                   |
| E6WAC8_PANSA/322-423                                                                     | 2 | Oral                   | Proteobacteria | 233  | 7.00E-59  | 72.78 | 709  | >GL892086<br>Enterobacter<br>hormaechei ATCC<br>49162                   |
| ENA_EHT12133_EHT12133.1_Raoultella_omithinolytica_10-5246_hypothetical_protein           | 2 | Oral                   | Proteobacteria | 1829 | 0         | 85.9  | 1723 | >ALNJ01000086<br>Klebsiella sp. OBRC7                                   |

|                                                                                     |   |                        |                |      |           |       |      |                                                                |
|-------------------------------------------------------------------------------------|---|------------------------|----------------|------|-----------|-------|------|----------------------------------------------------------------|
| G7LV45_9ENTR/322-423                                                                | 2 | Oral                   | Proteobacteria | 387  | 5.00E-105 | 75.31 | 875  | >ALNJ01000086<br>Klebsiella sp. OBRC7                          |
| ENA_EER56350_EER56350.1_Neisseria_flavescens_SK114_hypothetical_protein_            | 4 | Oral                   | Proteobacteria | 1397 | 0         | 100   | 756  | >ACQV01000022<br>Neisseria flavescens SK114                    |
| A0A077KL19_9FLAO/353-454                                                            | 2 | Oral                   | Proteobacteria | 2289 | 0         | 89.09 | 1842 | >GL379781<br>Chryseobacterium gleum ATCC 35910                 |
| A7MLT3_CROS8/322-423                                                                | 2 | Gastrointestinal_tract | Proteobacteria | 630  | 1.00E-178 | 74.42 | 1591 | >AMLL01000012<br>Klebsiella pneumoniae subsp. pneumoniae WGLW1 |
| ENA_EFK33376_EFK33376.1_Chryseobacterium_gleum_ATCC_35910_A_cyltransferase_         | 2 | Oral                   | Proteobacteria | 3402 | 0         | 100   | 1842 | >GL379781<br>Chryseobacterium gleum ATCC 35910                 |
| ENA_CAP01857_CAP01857.2_Acinetobacter_baumannii_SDF_conserved_hypothetical_protein_ | 4 | Pathogen               | Proteobacteria | 1441 | 0         | 99    | 804  | >ACQB01000026<br>Acinetobacter baumannii ATCC 19606            |

1

2 \* Red text indicates that the original body reference genome location specified airways or blood, which likely  
3 are not the origin microbiome site. Analysis of available datasets based on reference genome analysis  
4 confirms the location indicated.

5

6



1 **Supplementary Info Table 3. Synthetic *N*-acyl amino acid MS data (observed *m/z* in positive ion mode).**

2

| Code | Amine moiety    | MW    | Obs <i>m/z</i> |
|------|-----------------|-------|----------------|
| A    | Alanine         | 327.3 | 328.35         |
| R    | Arginine        | 412.3 | 413.49         |
| N    | Asparagine      | 370.3 | 371.40         |
| D    | Aspartatic acid | 371.3 | 372.40         |
| C    | Cysteine        | 359.2 | 360.37         |
| Q    | Glutamine       | 384.3 | 385.44         |
| E    | Glutamic acid   | 385.3 | 386.43         |
| G    | Glycine         | 313.3 | 314.34         |
| H    | Histidine       | 393.3 | 394.44         |
| I    | Isoleucine      | 369.3 | 369.23         |
| L    | Leucine         | 369.3 | 369.24         |
| K    | Lysine          | 384.3 | 385.47         |
| M    | Methionine      | 387.3 | 388.42         |
| F    | Phenylalanine   | 403.3 | 404.45         |
| P    | Proline         | 353.3 | 354.42         |
| S    | Serine          | 343.3 | 344.35         |
| T    | Threonine       | 357.3 | 358.42         |
| W    | Tryptophan      | 442.3 | 443.48         |
| Y    | Tyrosine        | 419.3 | 420.48         |
| V    | Valine          | 355.3 | 356.48         |

3

1 **References**

2

3 1 Brady, S. F., Chao, C. J. & Clardy, J. New natural product families from an environmental DNA (eDNA)  
4 gene cluster. *Journal of the American Chemical Society* **124**, 9968-9969 (2002).

5
